# Supplementary material
Source: MDPI journal article supplement (https://www.mdpi.com/2227-9040/11/1/47)
Supplement: s1 [file s1]

## SUPPLEMENTARY MATERIALS

# Near-infrared emitting *meso*-substituted heptamethine cyanine dyes: From the synthesis and photophysics to their use in bioimaging

Louise Kommers Reimann,<sup>1</sup> Daniela de Souza Fortes,<sup>1</sup> Fabiano da Silveira Santos,<sup>1</sup> Henrique de Castro Silva Junior,<sup>1</sup> Ana Moira Morás,<sup>2</sup> Dinara Jaqueline Moura,<sup>2</sup> Rodrigo da Costa Duarte,<sup>1</sup> Fabiano Severo Rodembusch<sup>1,\*</sup>

<sup>1</sup> Grupo de Pesquisa em Fotoquímica Orgânica Aplicada, Instituto de Química, Departamento de Química Orgânica, Universidade Federal do Rio Grande do Sul (UFRGS), Porto Alegre, Postal code 91501-970, Brazil.

<sup>2</sup> Laboratório de Genética Toxicológica, Universidade Federal de Ciências da Saúde de Porto Alegre (UFCSPA), Porto Alegre, Postal code 90240-511, Brazil

\* Correspondence: fabiano.rodembusch@ufrgs.br

### Summary

|                                     |   |
|-------------------------------------|---|
| Spectroscopic characterization..... | 2 |
| Additional photophysics data.....   | 4 |
| Theoretical calculations.....       | 4 |

### Spectroscopic characterization

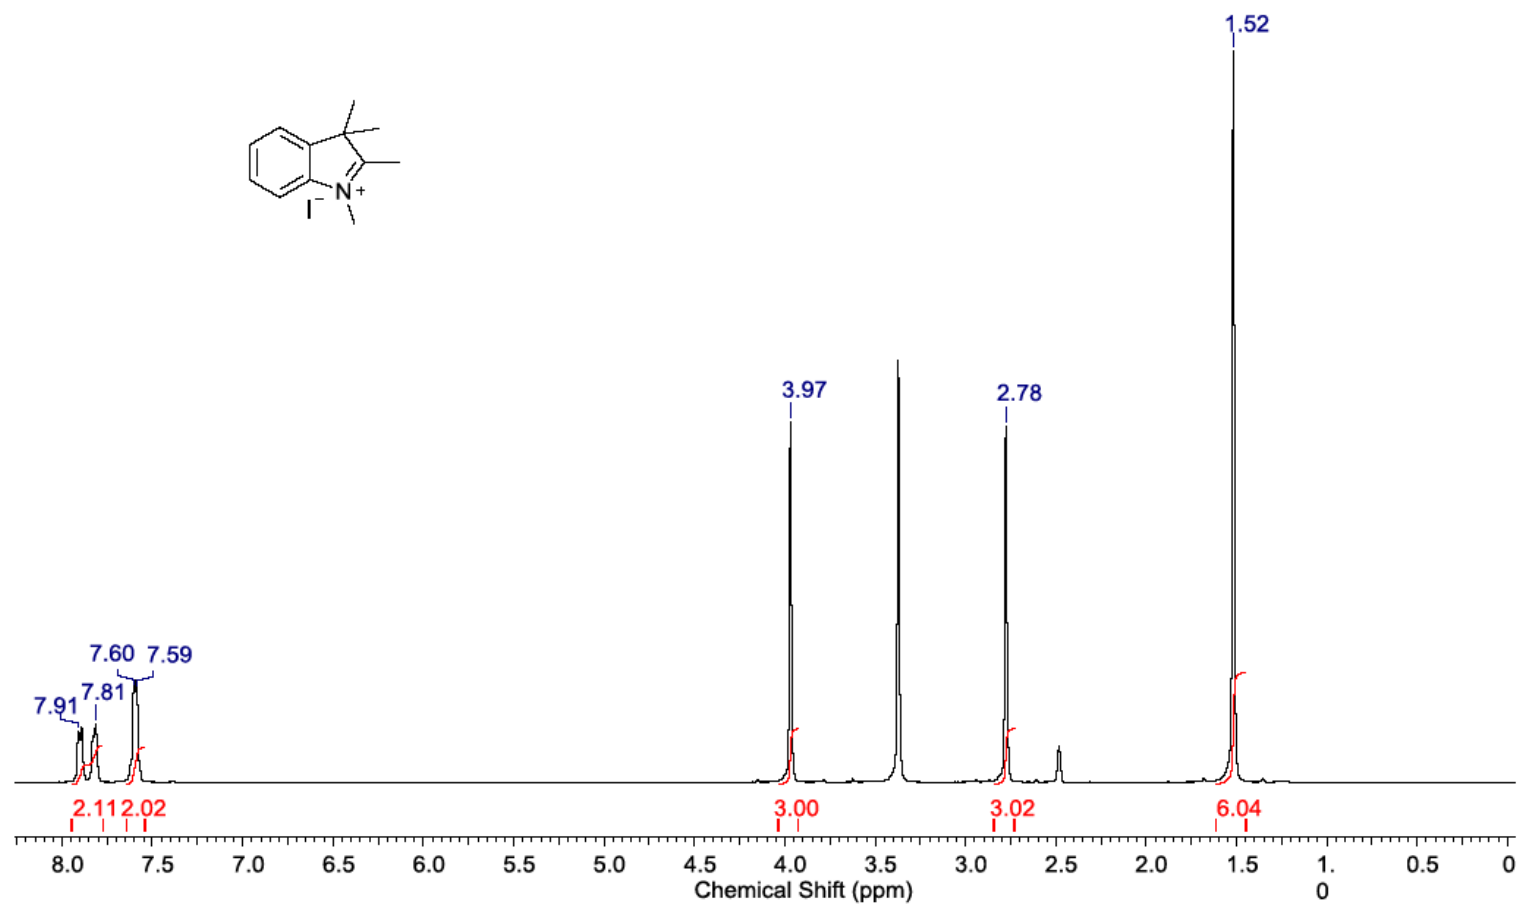

**Figure S1.**  $^1\text{H}$  NMR spectrum of indole **3a** in  $\text{DMSO-}d_6$  (300MHz).

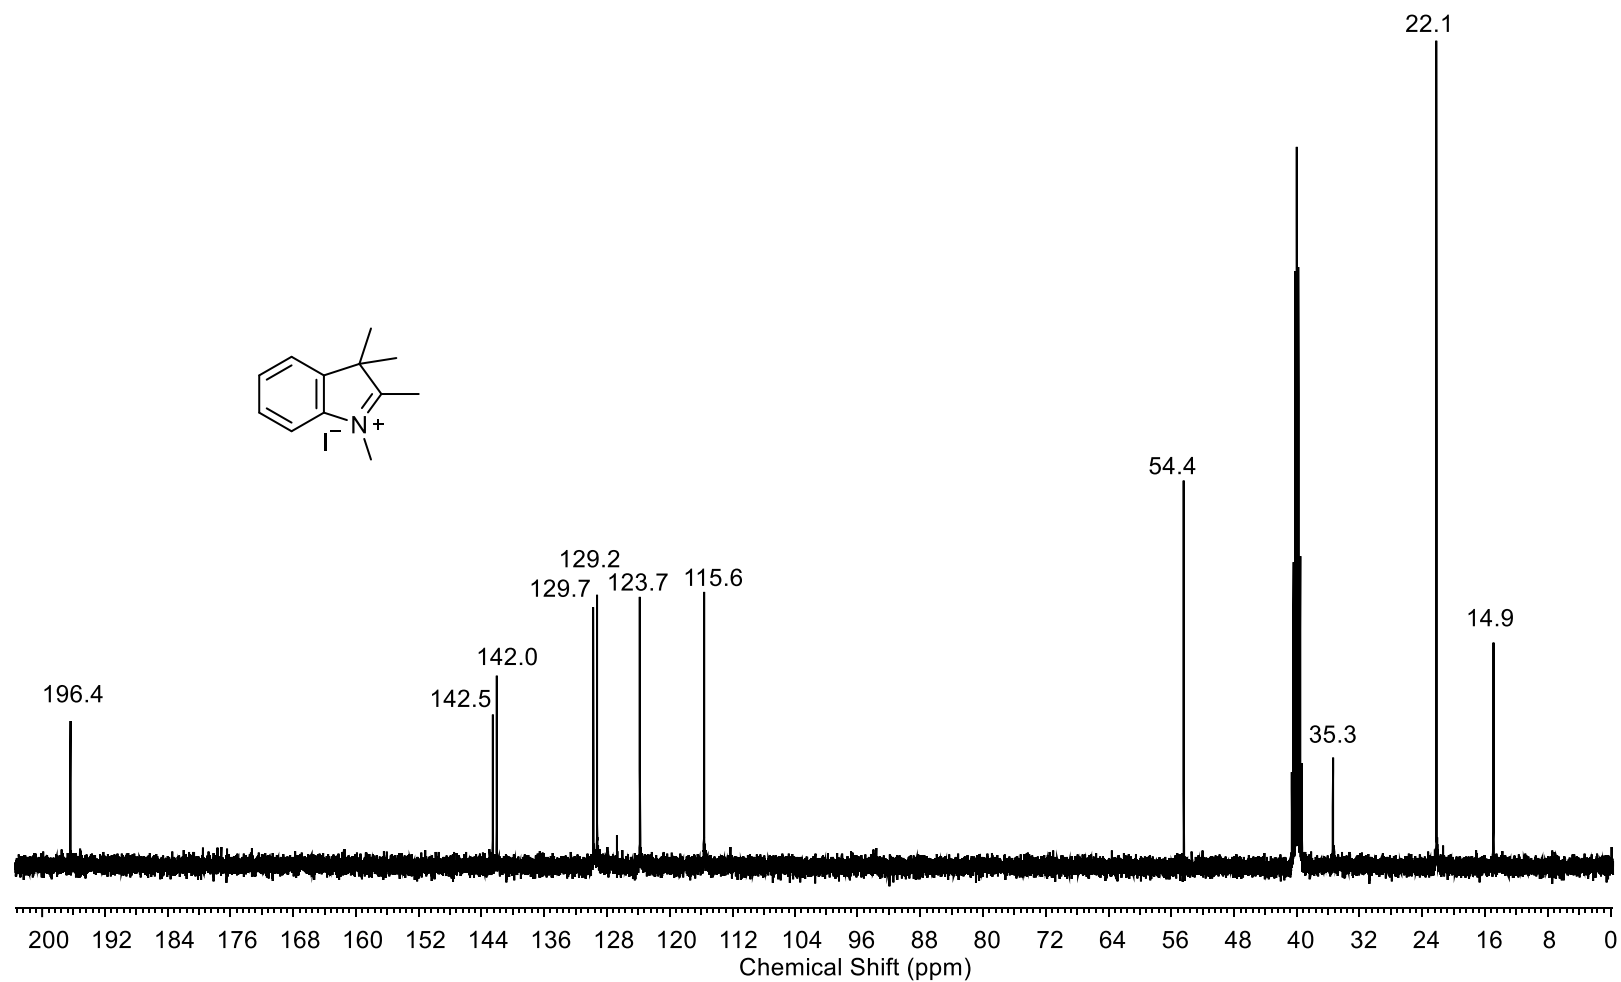

**Figure S2.** <sup>13</sup>C NMR spectrum of indole **3a** in DMSO-*d*<sub>6</sub> (75 MHz).

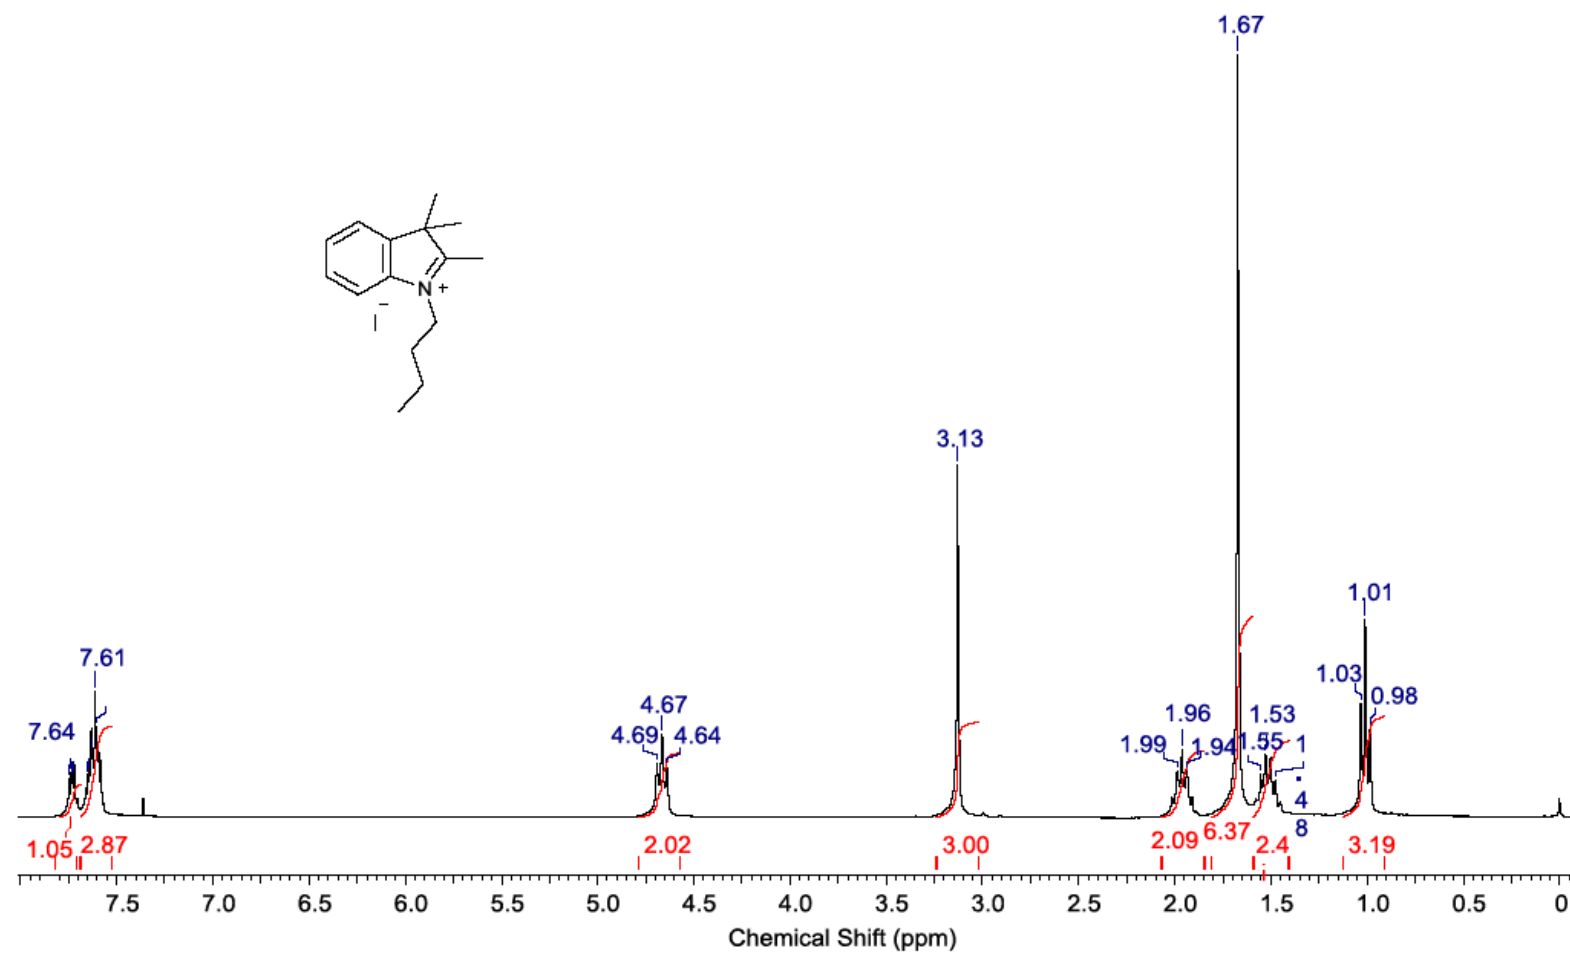

**Figure S3.**  $^1\text{H}$  NMR spectrum of indole **3b** in  $\text{CDCl}_3$  (400 MHz).

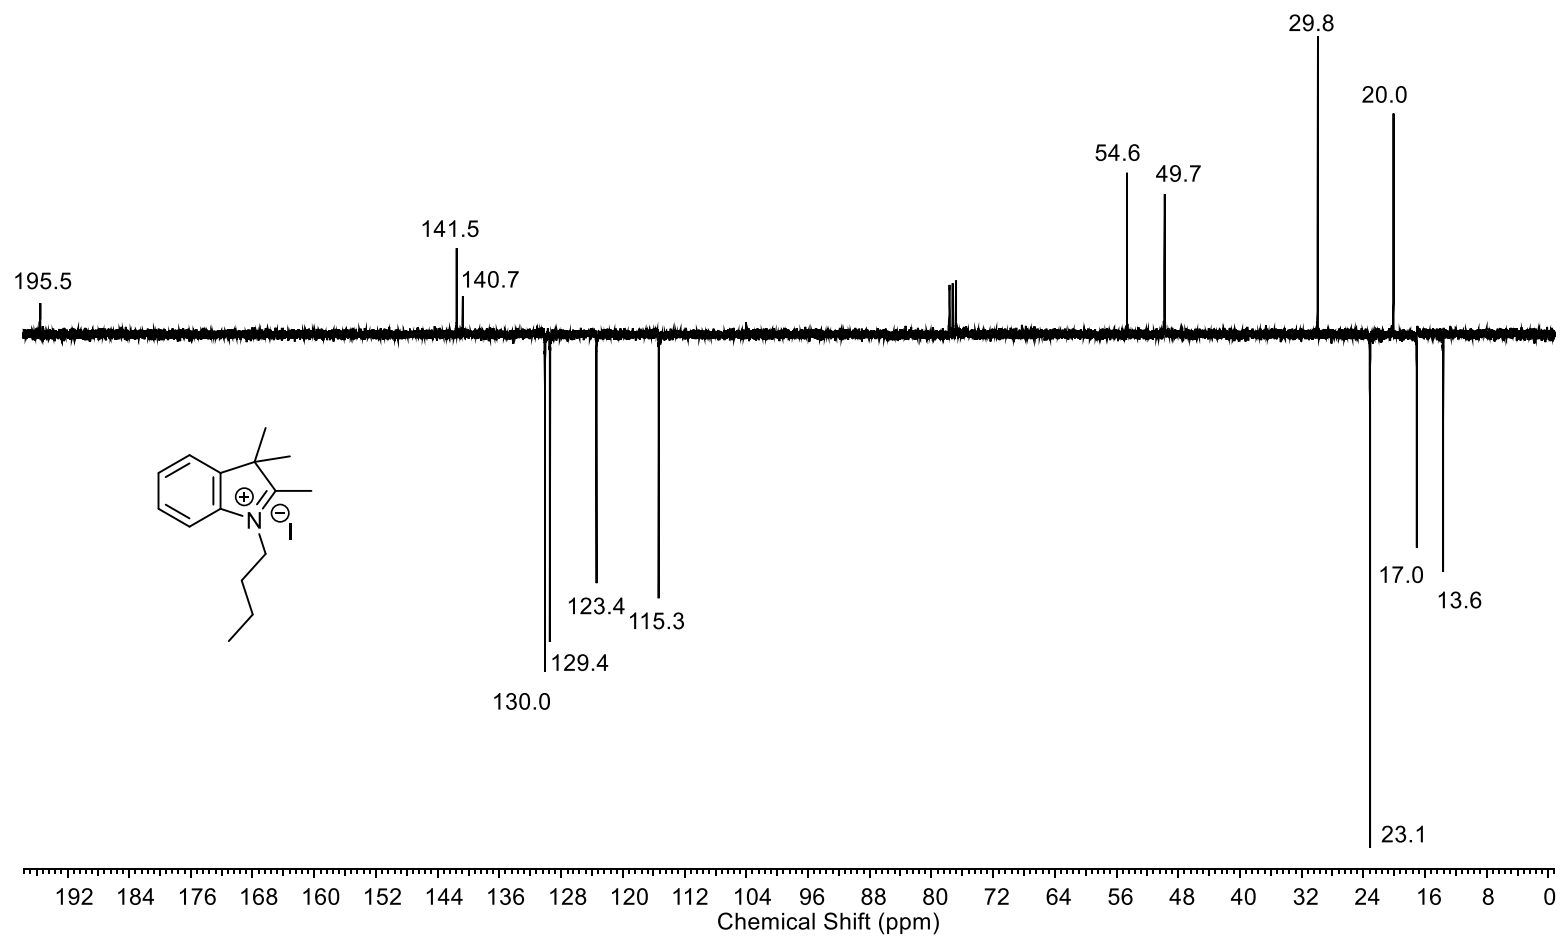

**Figure S4.**  $^{13}\text{C}$  APT NMR spectrum of indole **3b** in  $\text{DMSO-}d_6$  (75 MHz).

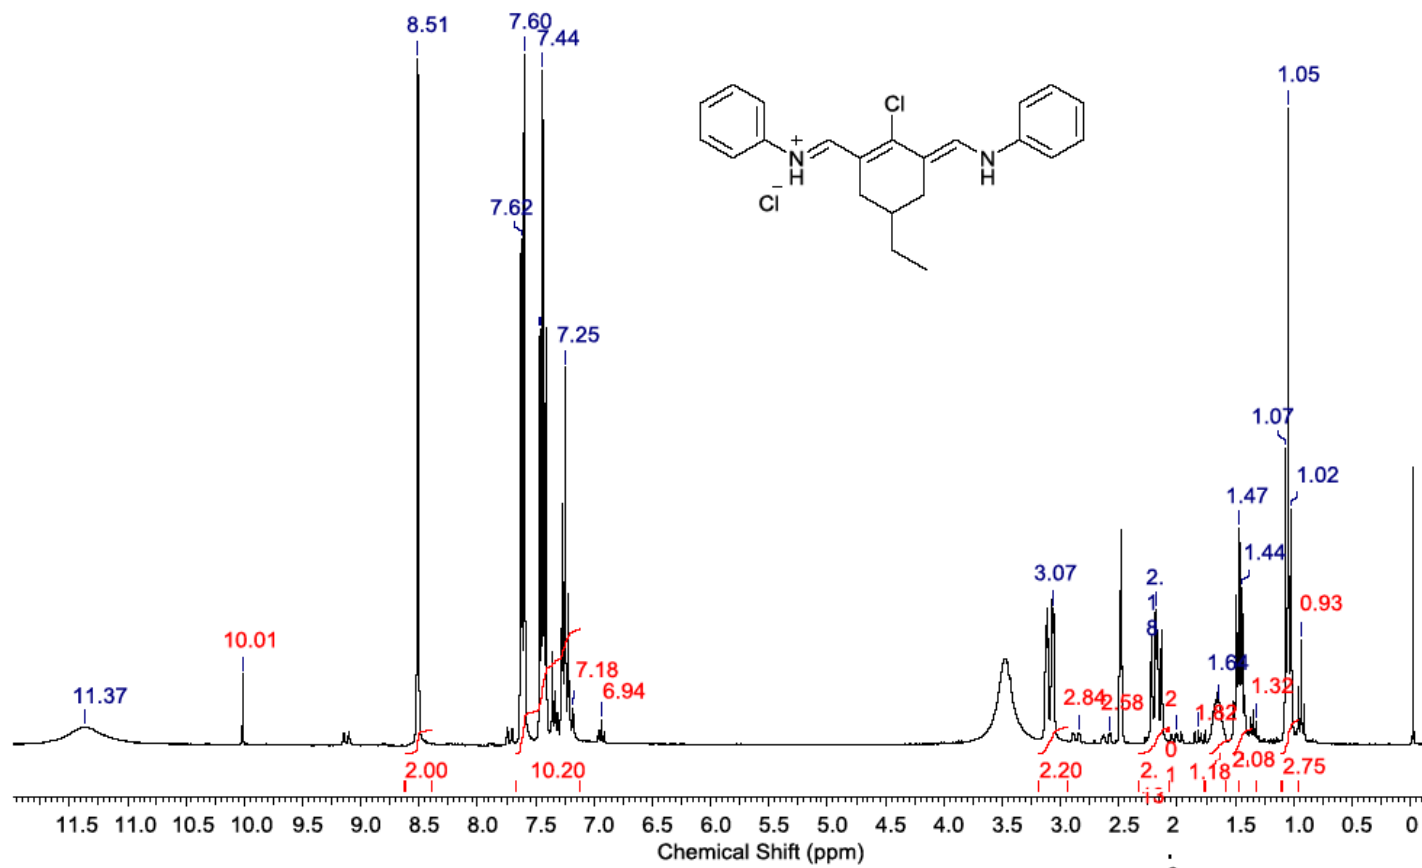

**Figure S5.** <sup>1</sup>H NMR spectrum of compound **5** in DMSO-*d*<sub>6</sub> (300 MHz).

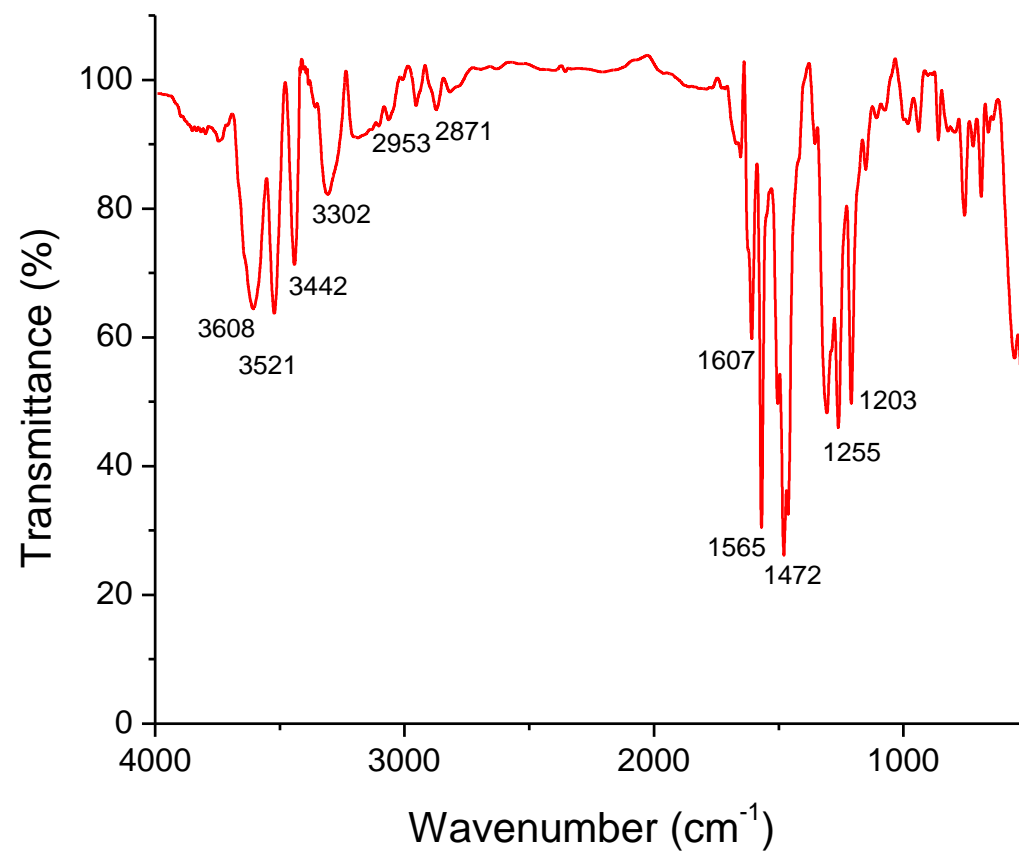

**Figure S6.** FTIR spectrum of compound **5** in KBr.

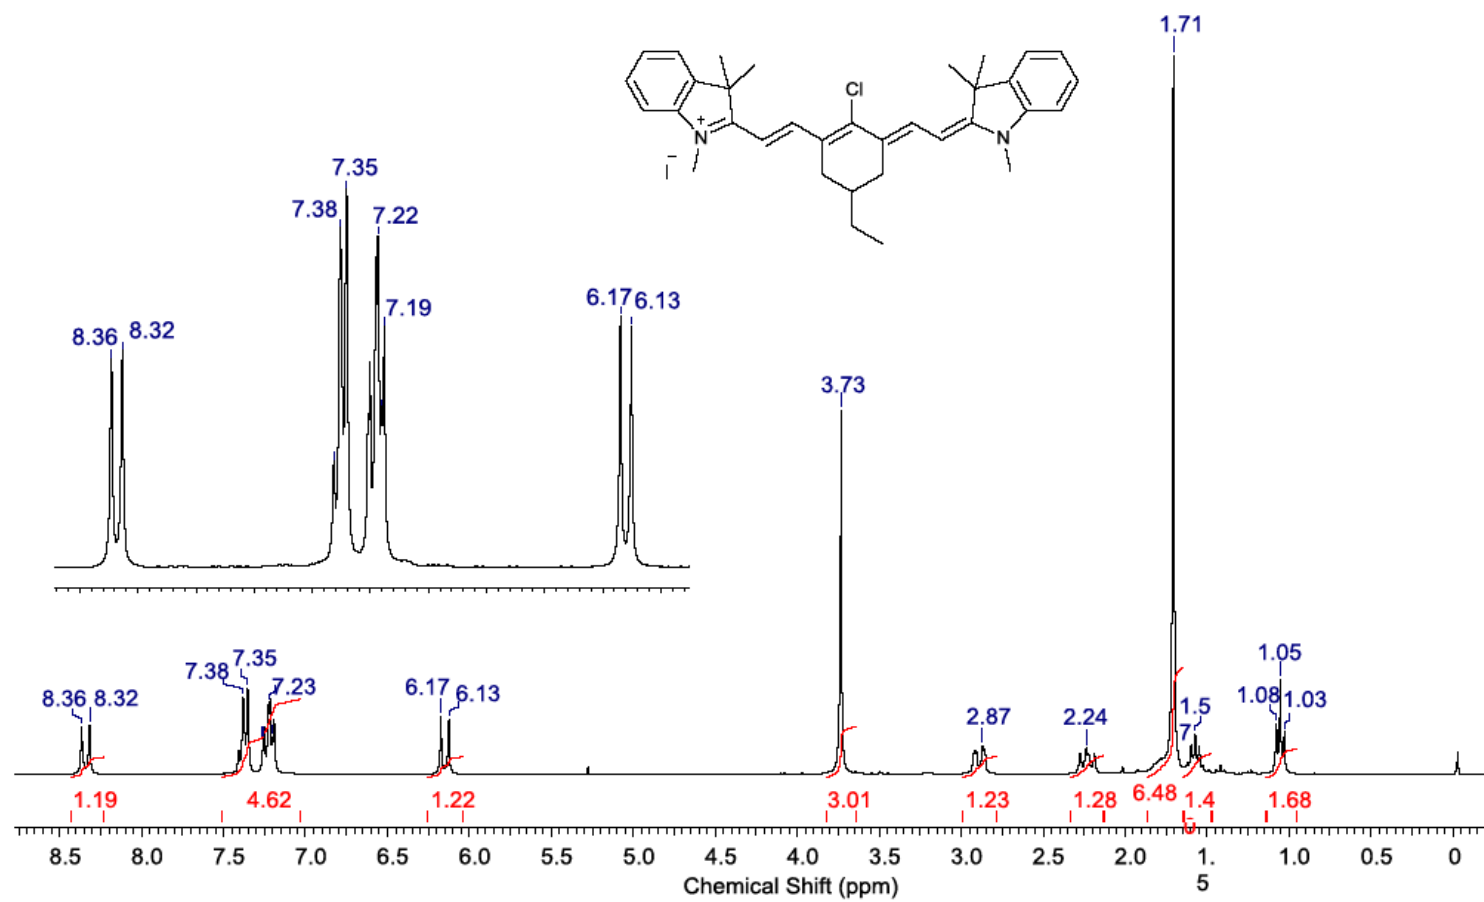

**Figure S7.**  $^1\text{H}$  NMR spectrum of heptamethine cyanine dye **6a** in  $\text{CDCl}_3$  (300 MHz).



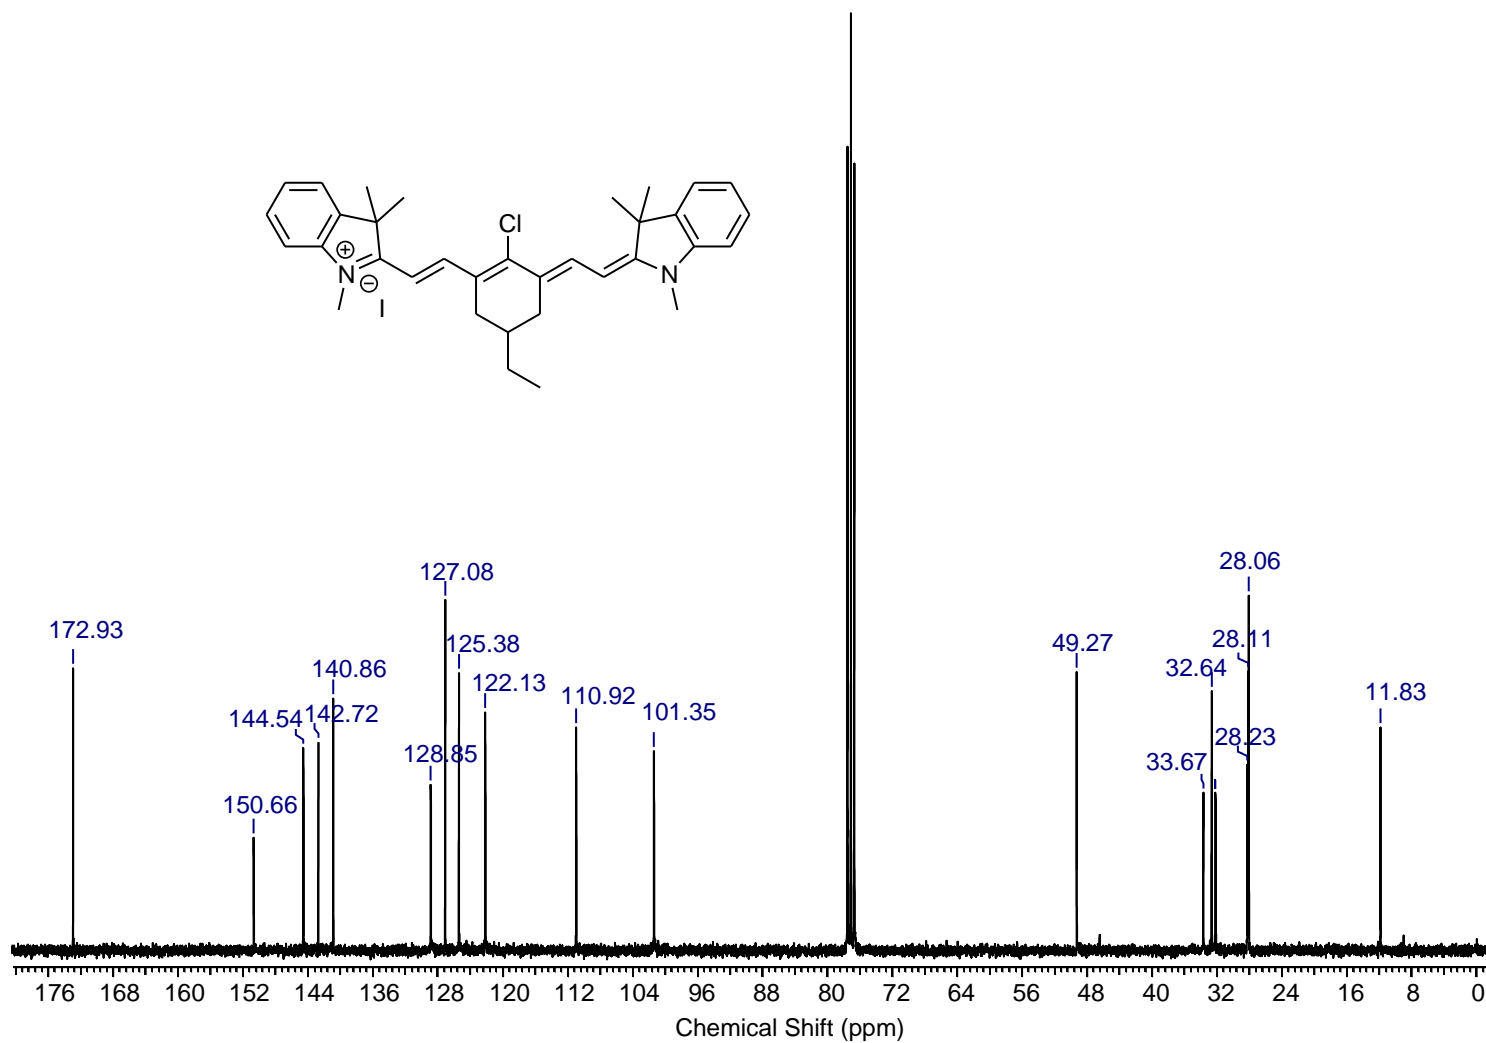

**Figure S8.**  $^{13}\text{C}$  NMR spectrum of heptamethine cyanine dye **6a** in  $\text{CDCl}_3$  (75 MHz).

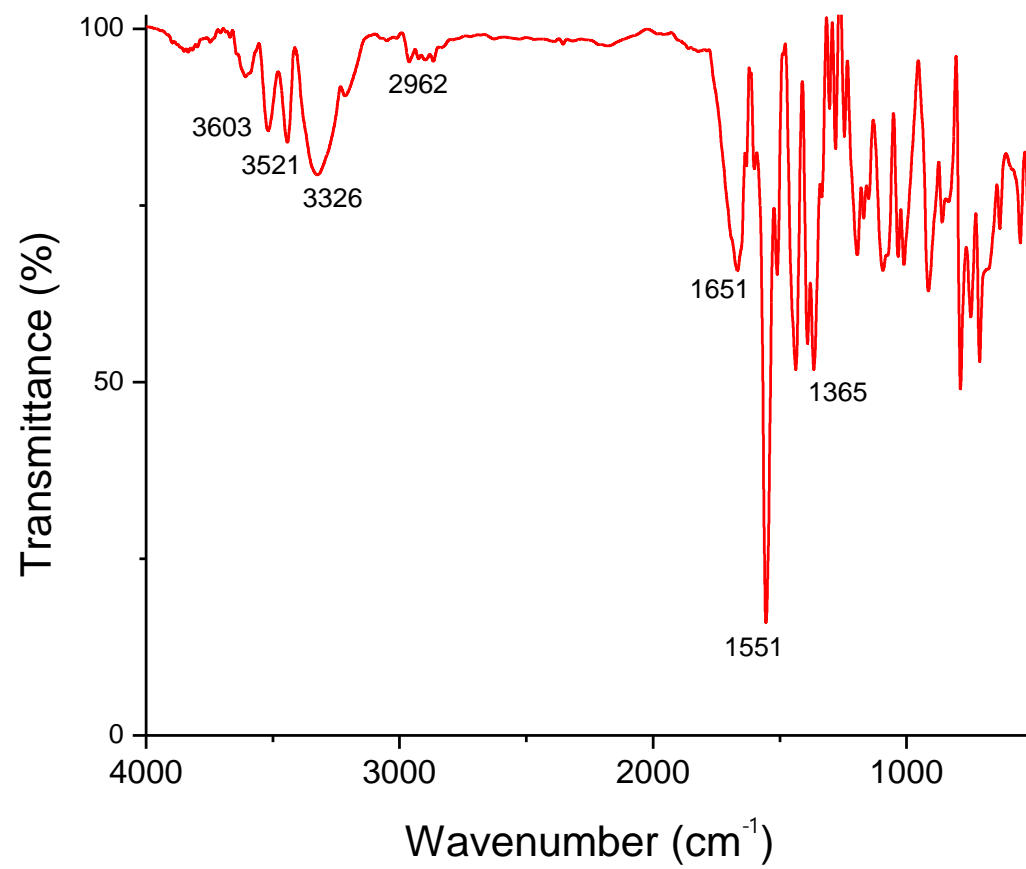

**Figure S9.** FTIR spectrum of heptamethine cyanine dye **6a** in KBr.

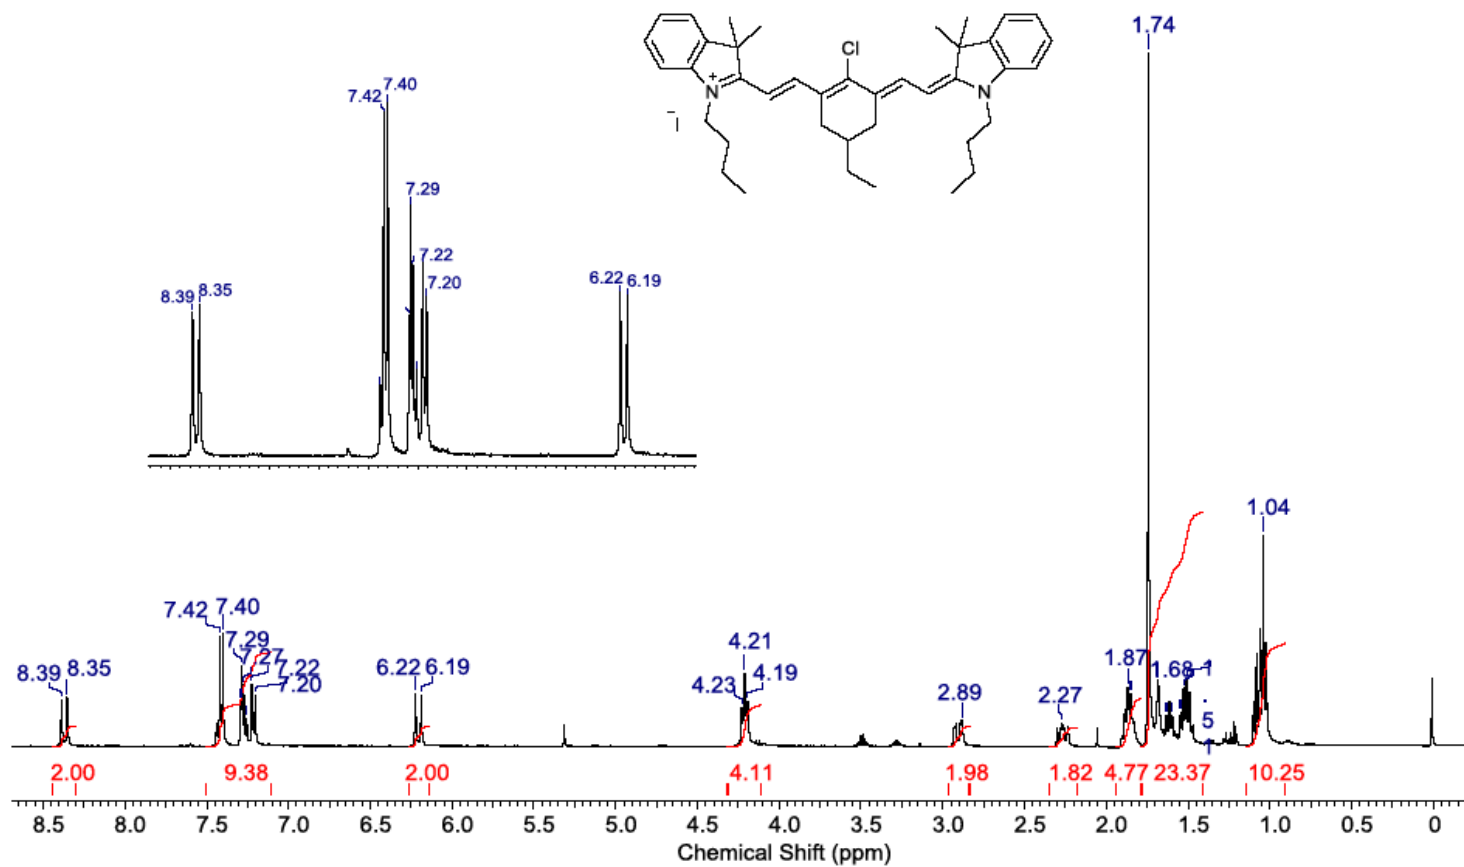

**Figure S10.**  $^1\text{H}$  NMR spectrum of heptamethine cyanine dye **6b** in  $\text{CDCl}_3$  (400 MHz).

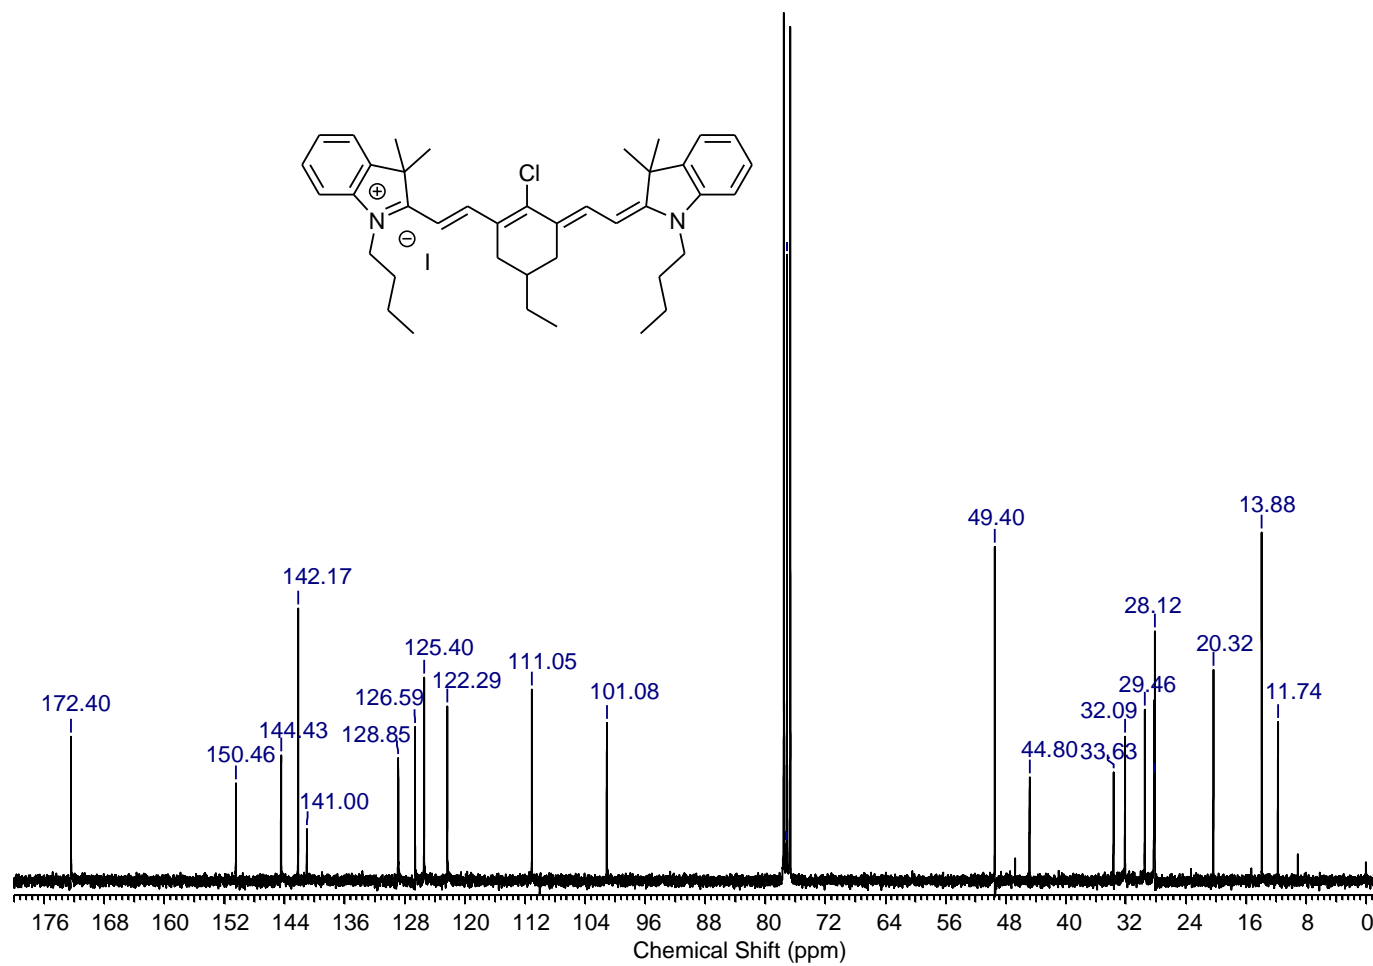

**Figure S11.**  $^{13}\text{C}$  NMR spectrum of heptamethine cyanine dye **6b** in  $\text{CDCl}_3$  (100 MHz).

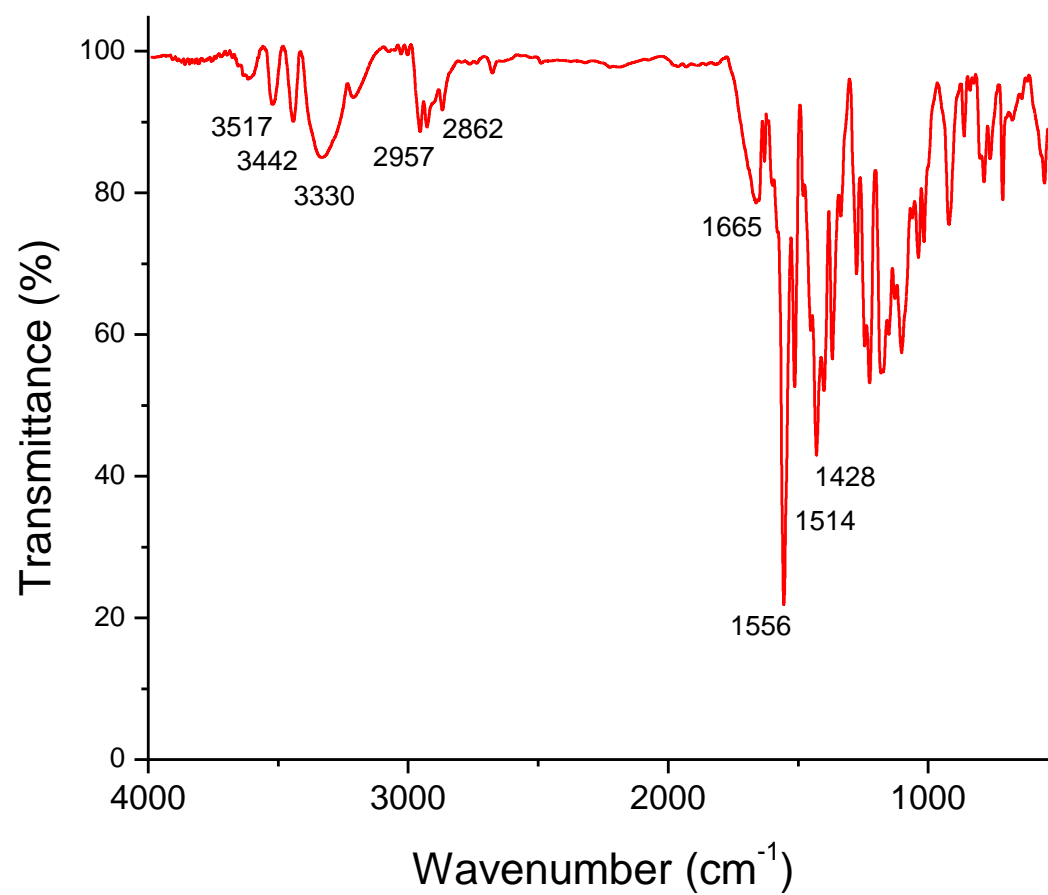

**Figure S12.** FTIR spectrum of heptamethine cyanine dye **6b** in KBr.



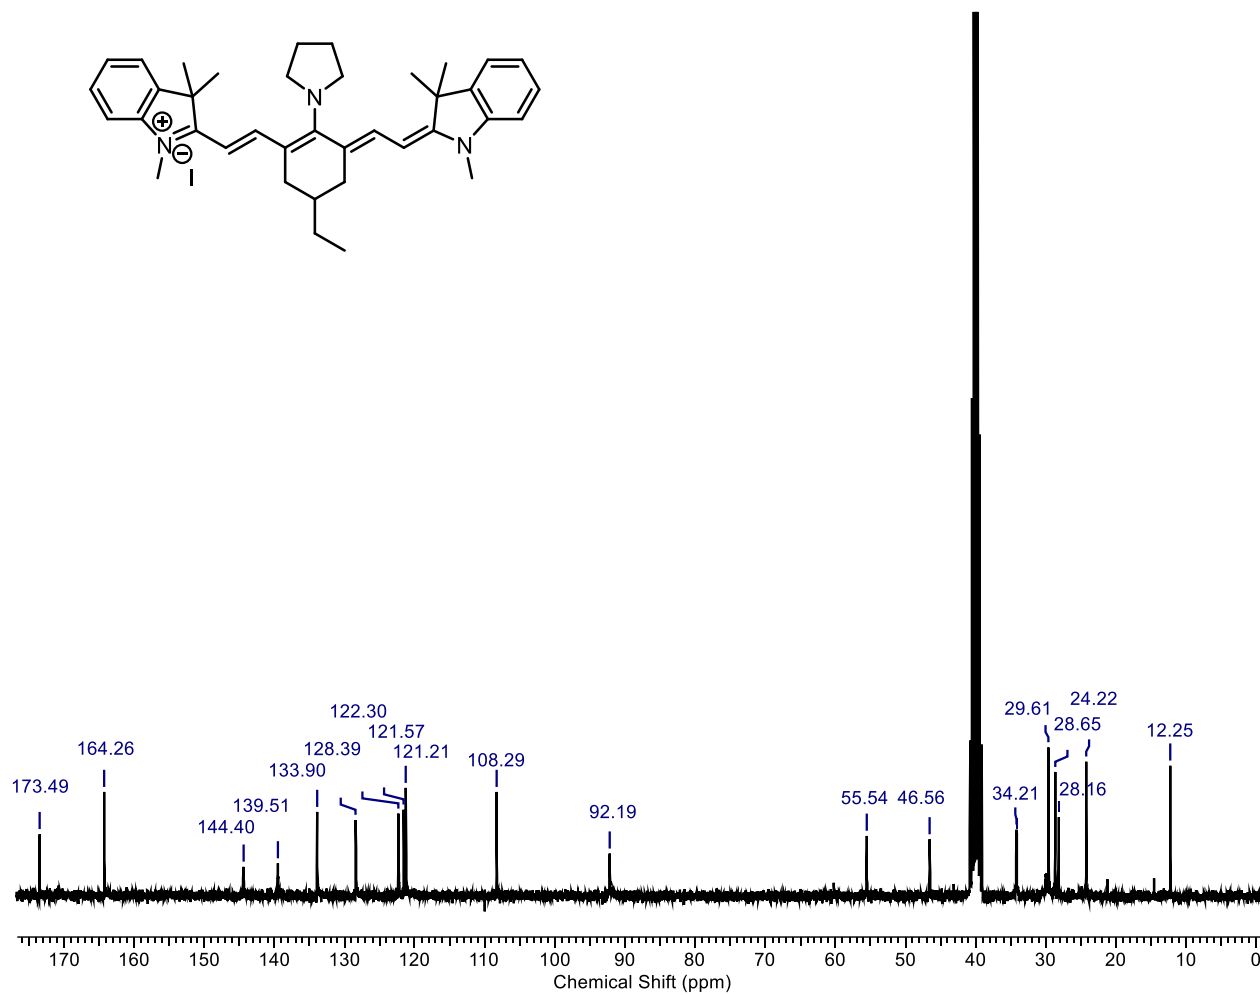

**Figure S14.**  $^{13}\text{C}$  NMR spectrum of *meso*-substituted cyanine dye **8a** in  $\text{DMSO}-d_6$  (75 MHz).

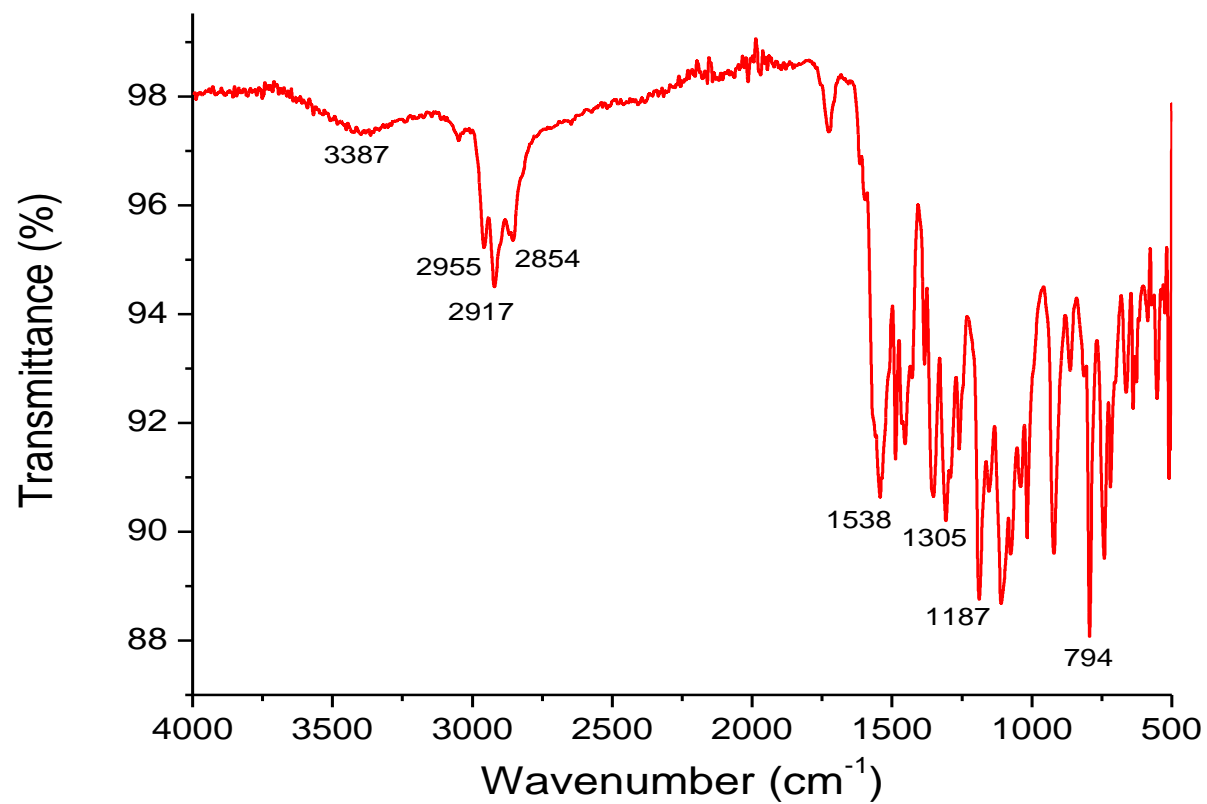

**Figure S15.** FTIR (ATR mode) spectrum of *meso*-substituted cyanine dye **8a**.



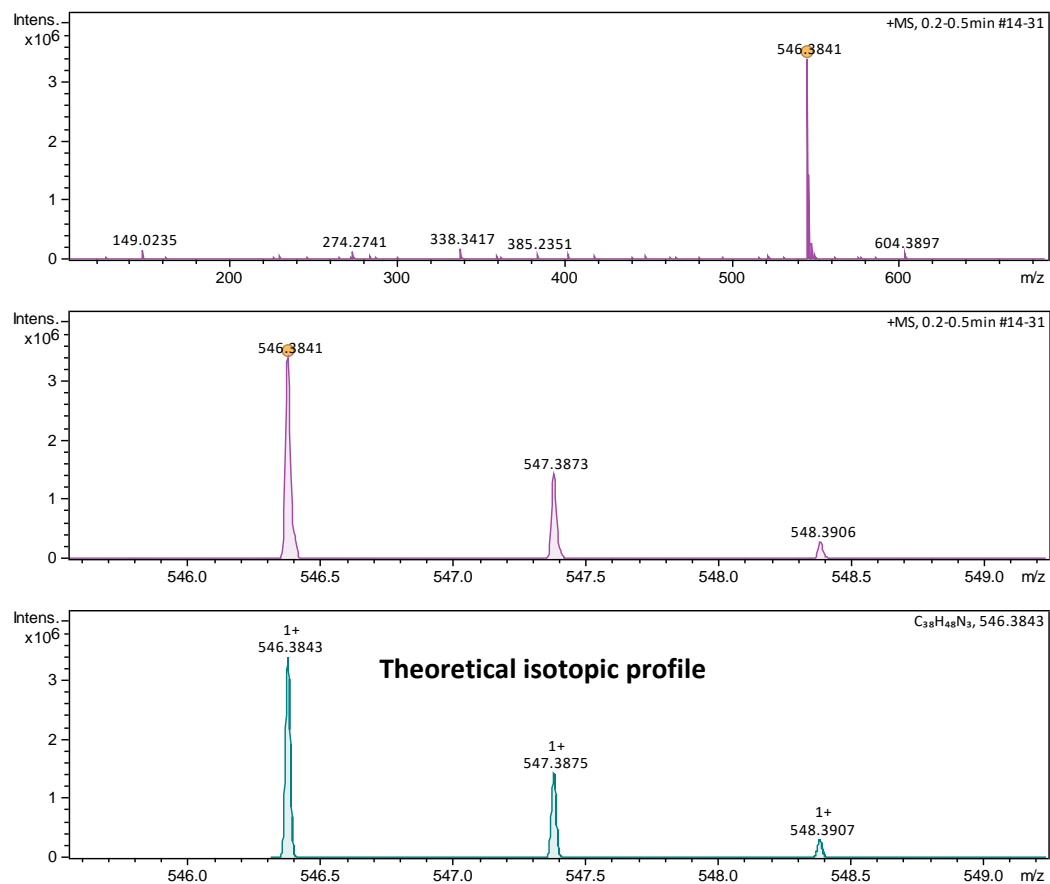

| Meas. m/z | Ion Formula | m/z      | err [ppm] | mSigma | rdb  | e <sup>-</sup> Conf | N-Rule |
|-----------|-------------|----------|-----------|--------|------|---------------------|--------|
| 546,3841  | C38H48N3    | 546,3843 | 0.3       | 2.2    | 16.5 | even                | ok     |

**Figure S16.** HRMS spectrum of *meso*-substituted cyanine dye **8a**.

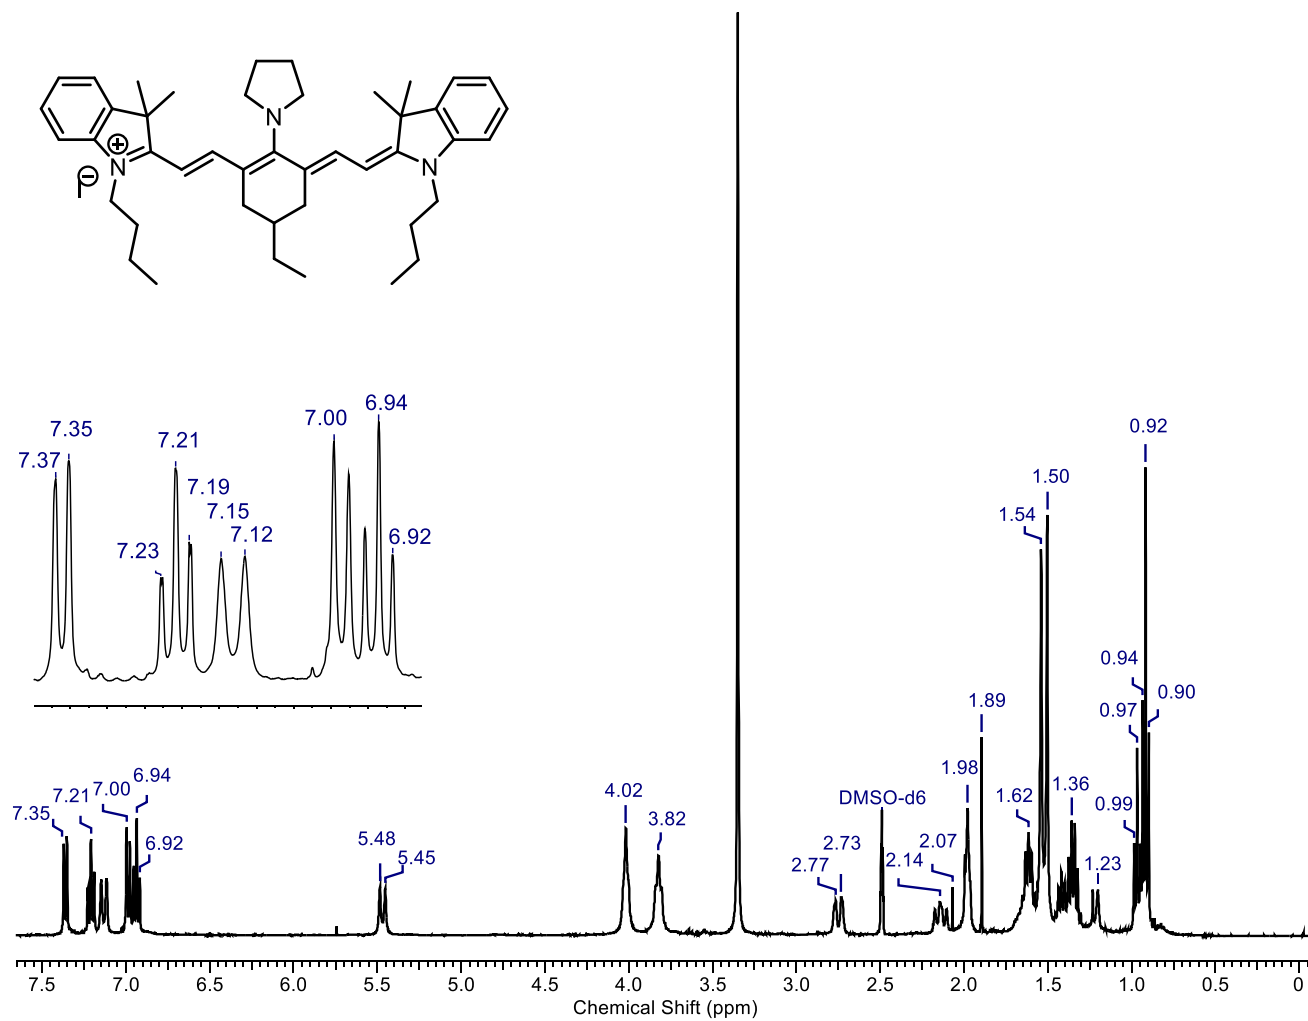

**Figure S17.** <sup>1</sup>H NMR spectrum of *meso*-substituted cyanine dye **8b** in DMSO-*d*<sub>6</sub> (400 MHz).

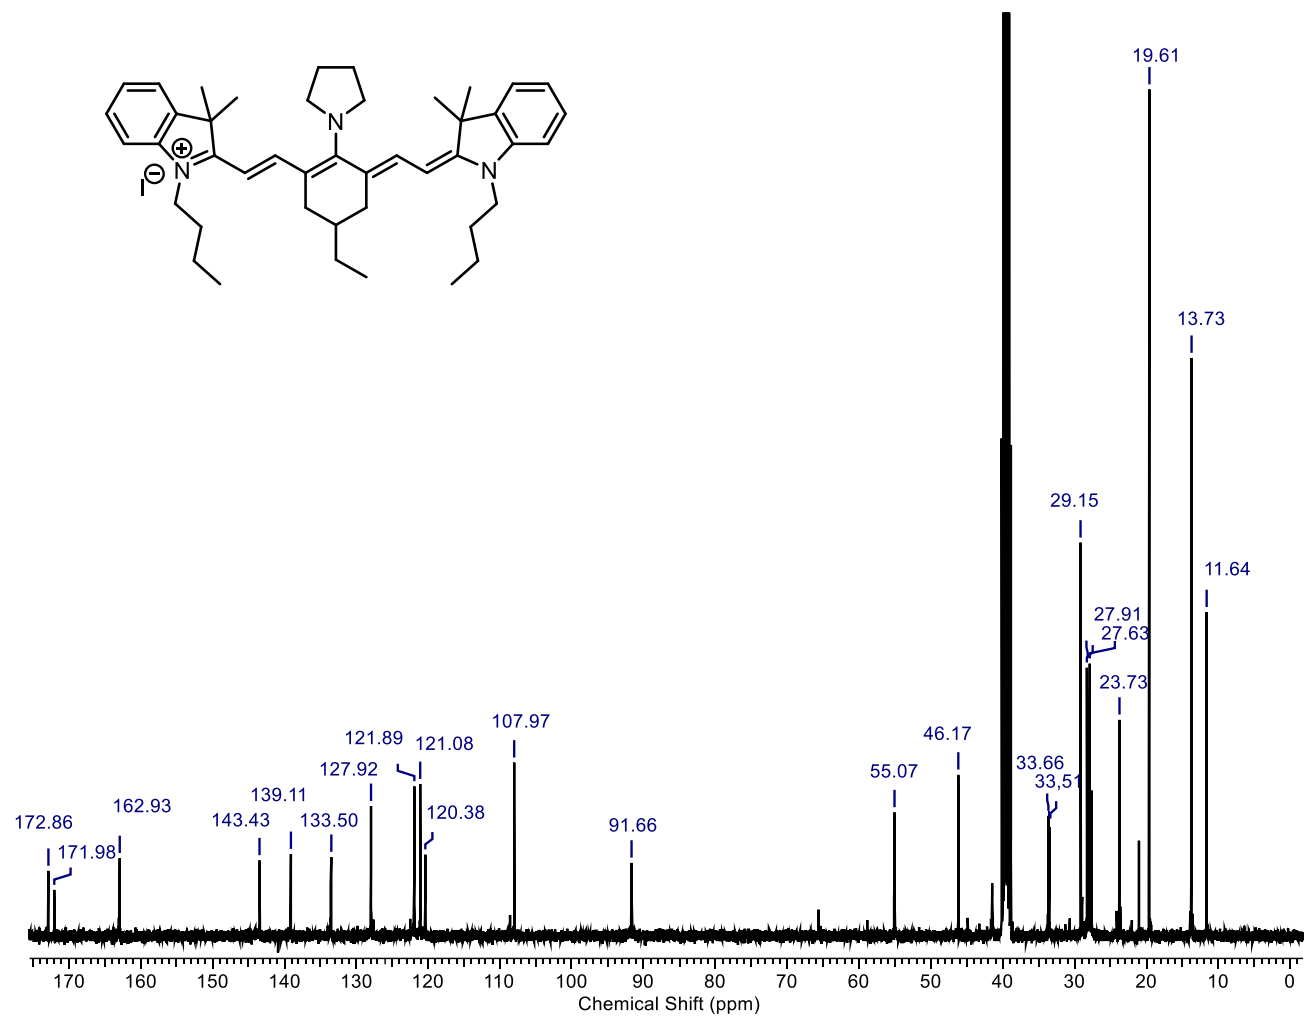

**Figure S18.**  $^{13}\text{C}$  NMR spectrum of meso-substituted cyanine dye **8b** in  $\text{DMSO}-d_6$  (100 MHz).

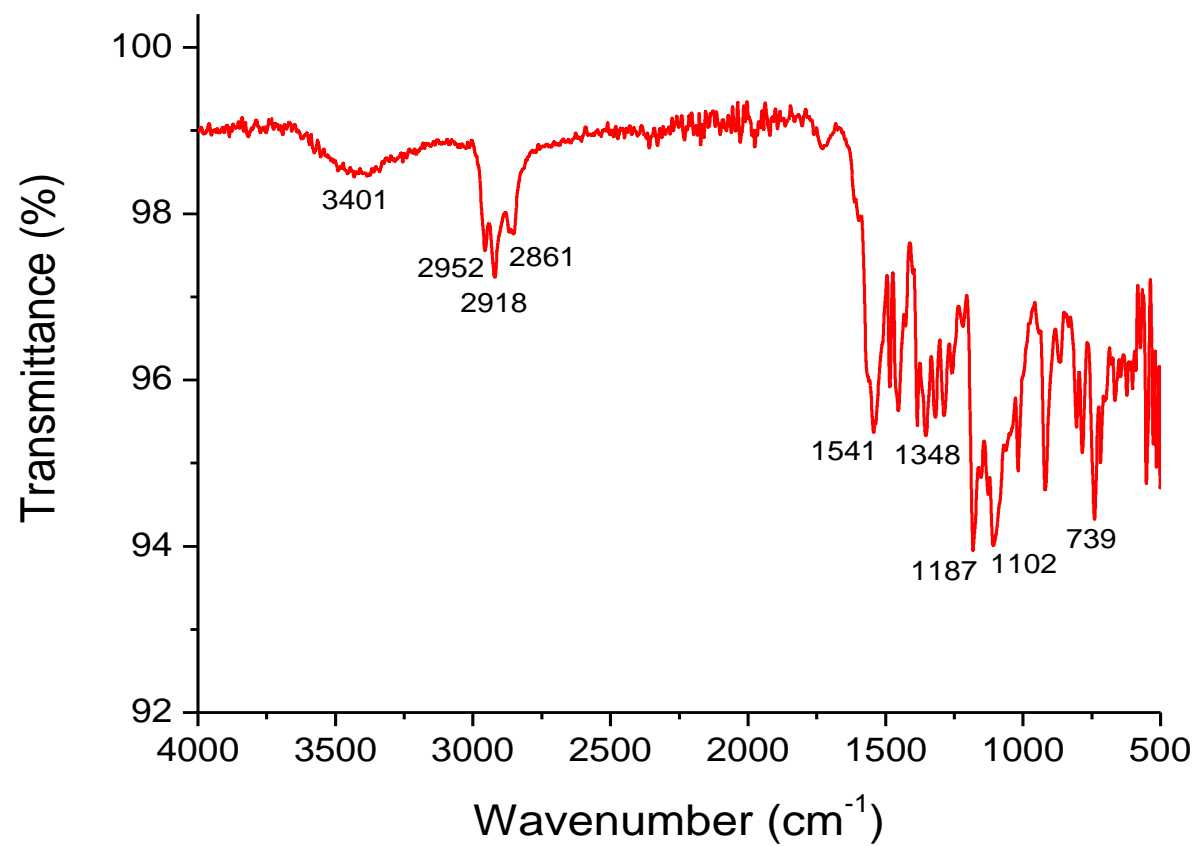

**Figure S19.** FTIR (ATR mode) spectrum of *meso*-substituted cyanine dye **8b**.

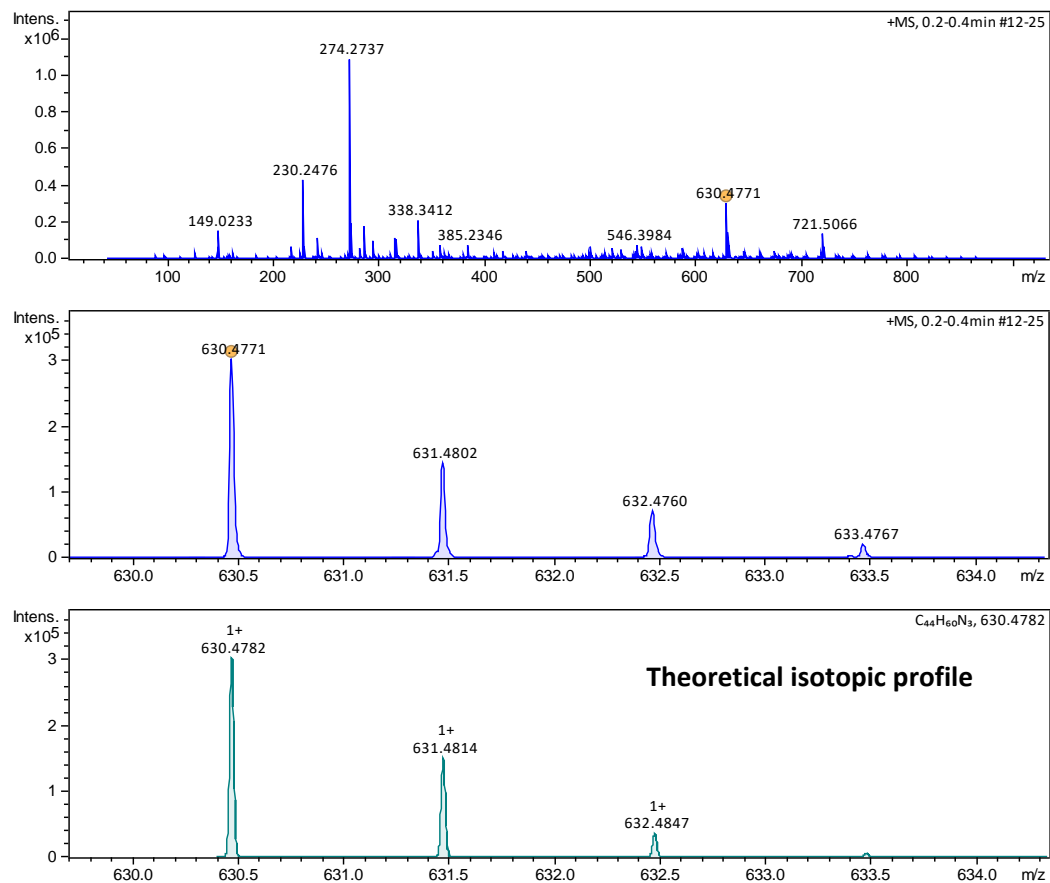

| Meas. m/z | Ion Formula                                    | m/z      | err [ppm] | mSigma | rdb  | e <sup>-</sup> Conf | N-Rule |
|-----------|------------------------------------------------|----------|-----------|--------|------|---------------------|--------|
| 630,4771  | C <sub>44</sub> H <sub>60</sub> N <sub>3</sub> | 630,4782 | 1.8       | 60.5   | 16.5 | even                | ok     |

**Figure S20.** HRMS spectrum of *meso*-substituted cyanine dye **8b**.

### Additional photophysics data

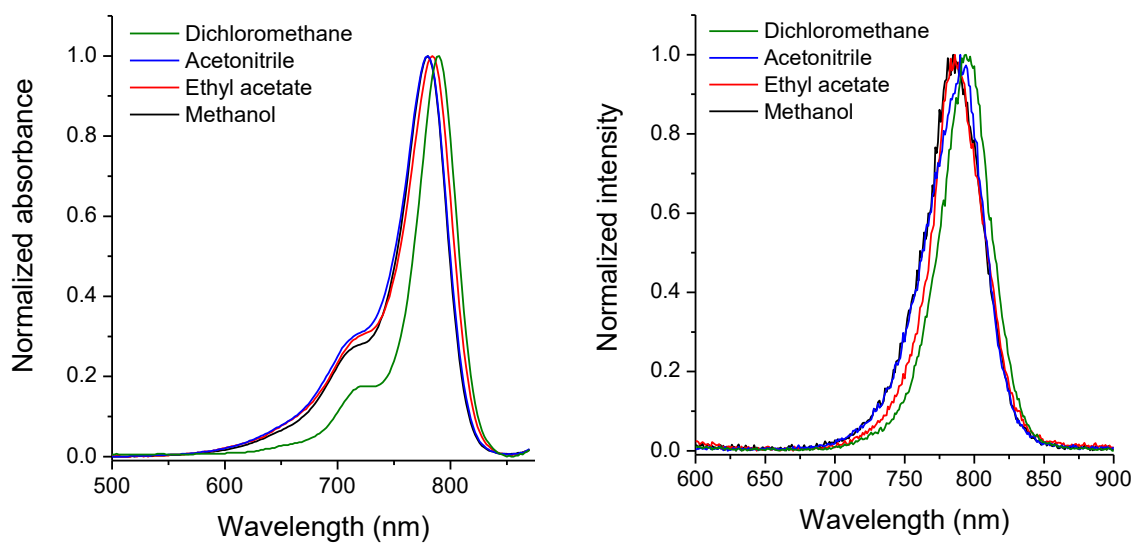

**Figure S21.** UV-Vis absorption (left) and steady-state fluorescence emission (right) spectra in solution of different organic solvents [ $\sim 10^{-6}$  M] of the heptamethine cyanine dye **6b**.

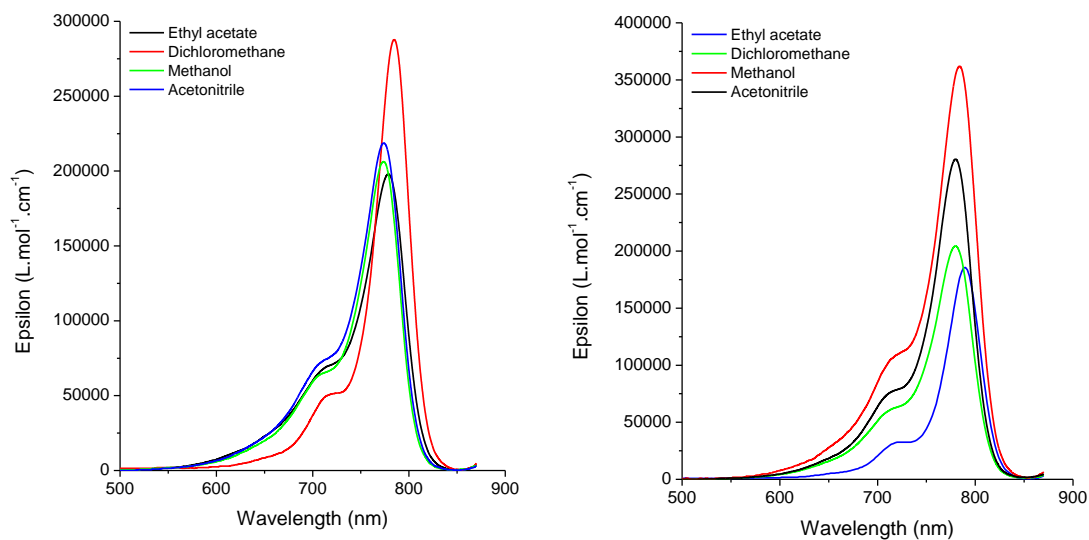

**Figure S22.** UV-Vis absorption spectra of cyanines **6a** (top) and **6b** (bottom) in solution of different organic solvents [ $\sim 10^{-6}$  M].

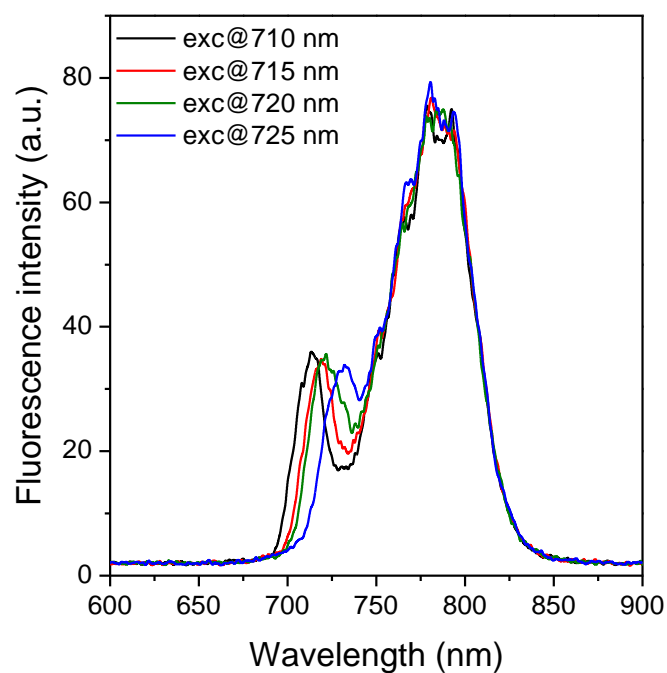

**Figure S23.** Steady-state fluorescence emission spectra in acetonitrile solution [ $\sim 10^{-6}$  M] at different excitation wavelengths of the heptamethine cyanine dye **6a** (Slits Em./Exc. 10.0 nm/10.0 nm).

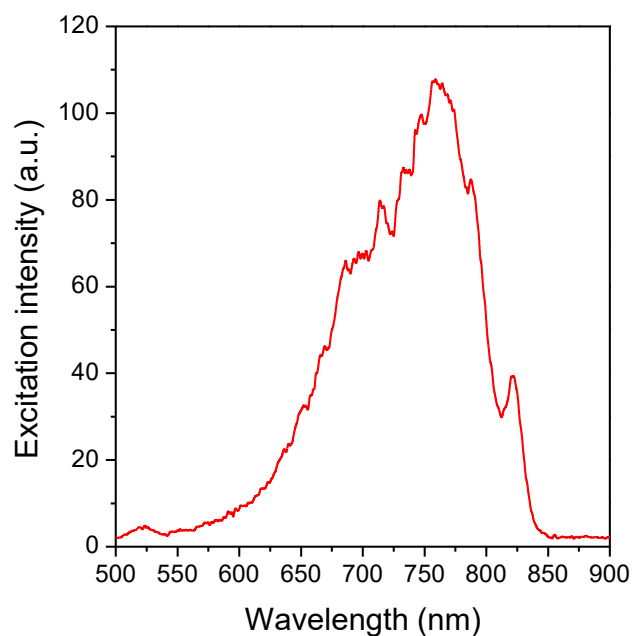

**Figure S24.** Excitation spectra in acetonitrile solution [ $\sim 10^{-6}$  M] of the heptamethine cyanine dye **6a** ( $\lambda_{\text{obs}}=787$  nm and slits Em./Exc. 10.0 nm/10.0 nm).

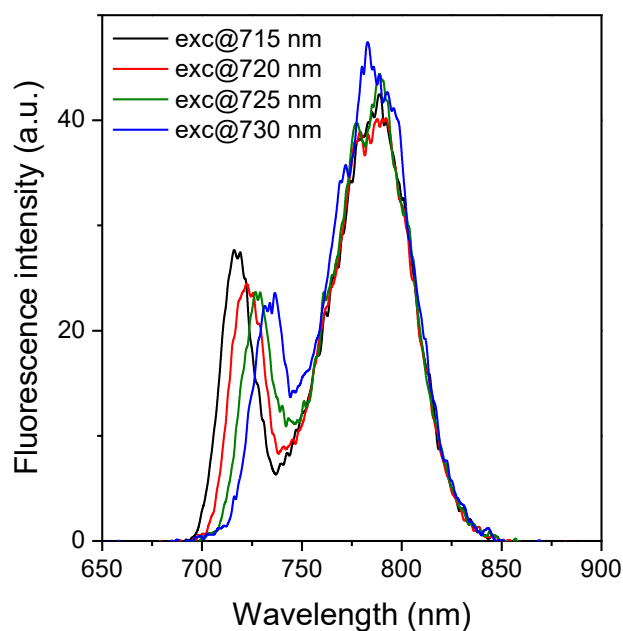

**Figure S25.** Steady-state fluorescence emission spectra in acetonitrile solution at different dye concentrations of the heptamethine cyanine dye **6b** (Slits Em./Exc. 10.0 nm/10.0 nm).

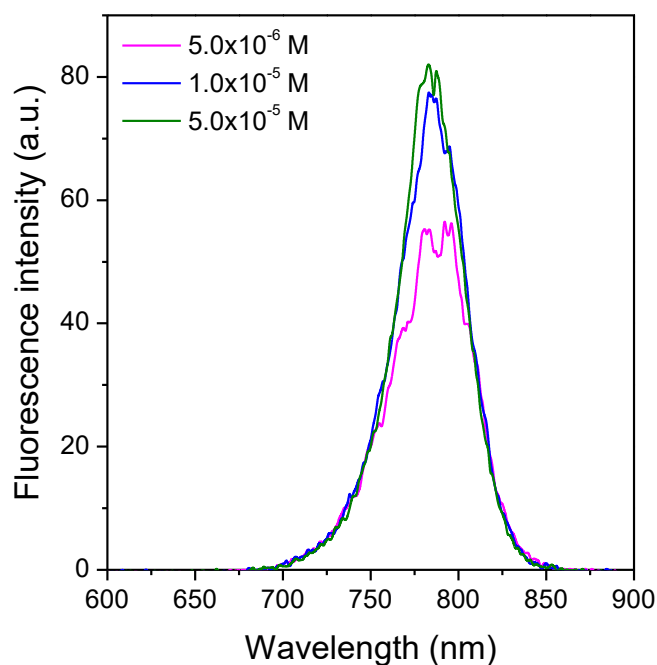

**Figure S26.** Steady-state fluorescence emission spectra in acetonitrile solution [ $\sim 10^{-6}$  M] at different excitation wavelengths of the heptamethine cyanine dye **6b** ( $\lambda_{\text{exc}}=780$  nm and slits Em./Exc. 10.0 nm/10.0 nm).



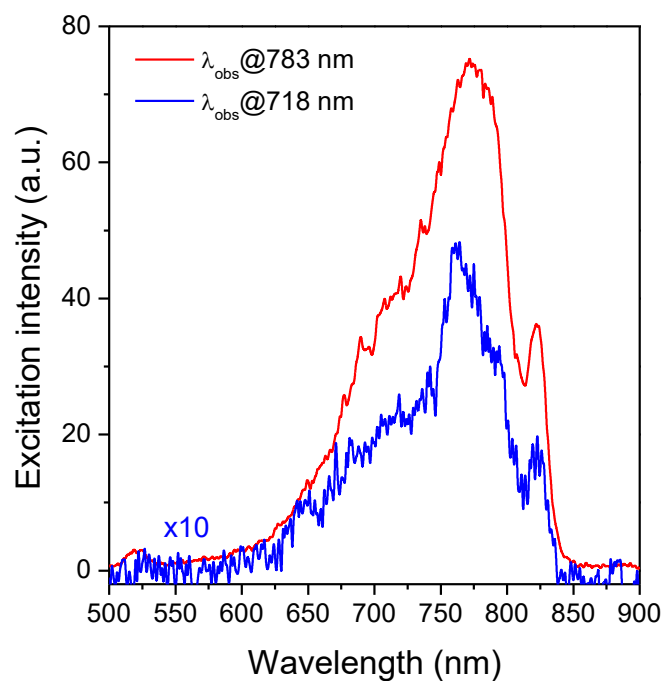

**Figure S27.** Excitation spectra in acetonitrile solution [ $\sim 10^{-6}$  M] of the heptamethine cyanine dye **6b** (Slits Em./Exc. 10.0 nm/10.0 nm).

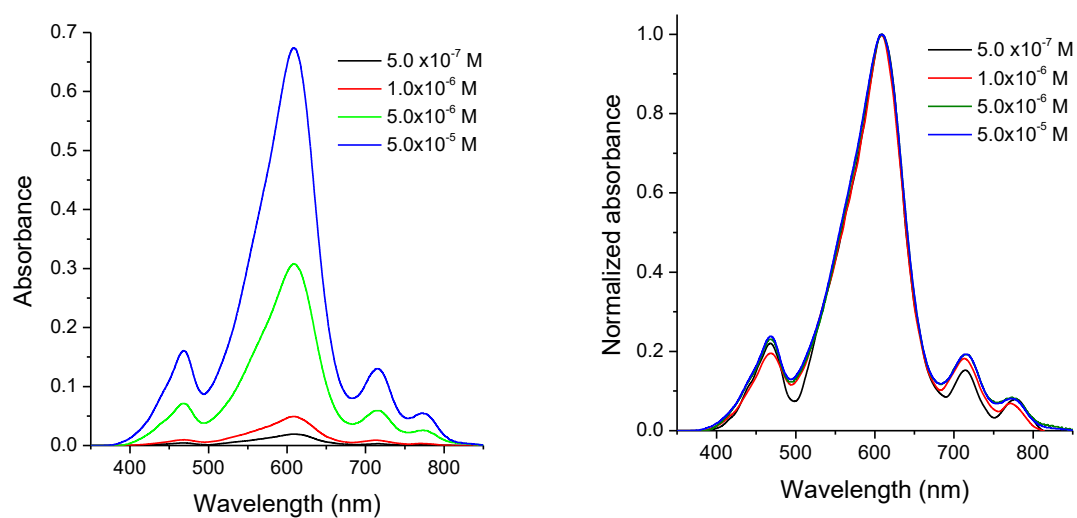

**Figure S28.** UV-Vis absorption spectra of *meso*-substituted cyanine dye **8b** in dichloromethane at different solution concentrations (left) and the respective normalized spectra (right).

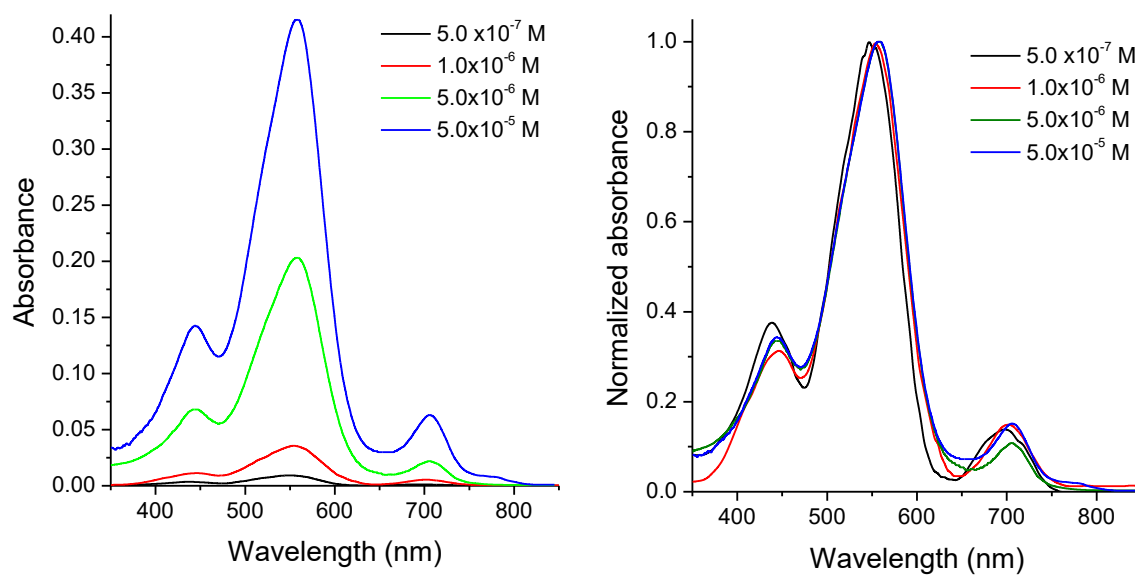

**Figure S29.** UV-Vis absorption spectra of *meso*-substituted cyanine dye **8b** in 1,4-dioxane at different solution concentrations (left) and the respective normalized spectra (right).

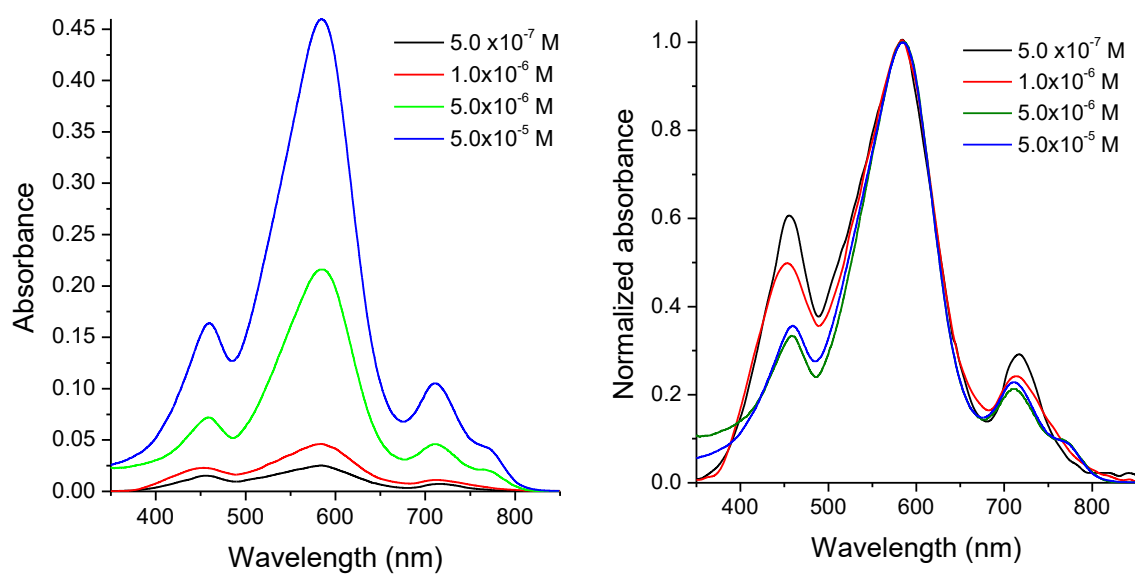

**Figure S30.** UV-Vis absorption spectra of *meso*-substituted cyanine dye **8b** in ethanol at different solution concentrations (left) and the respective normalized spectra (right).

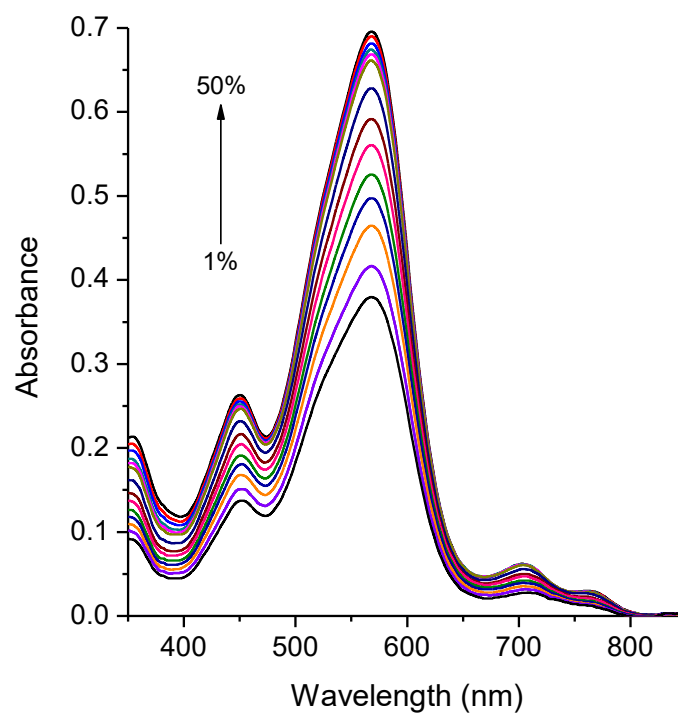

**Figure S31.** UV-Vis absorption spectra of *meso*-substituted cyanine dye **8b** in acetonitrile ( $\sim 10^{-5}$  M) (black line) at different water content (1%-50%).

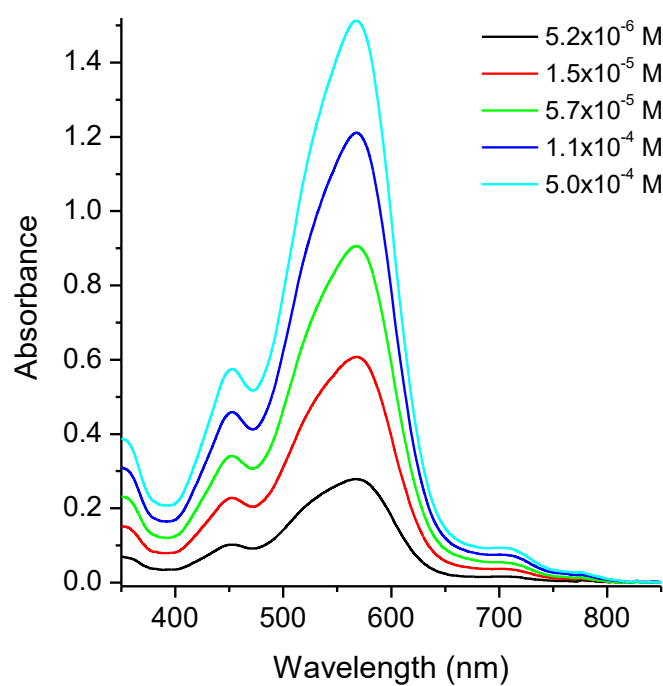

**Figure S32.** UV-Vis absorption spectra of *meso*-substituted cyanine dye **8b** in acetonitrile:water (1:1) ( $\sim 10^{-5}$  M) solution at different dye concentrations.

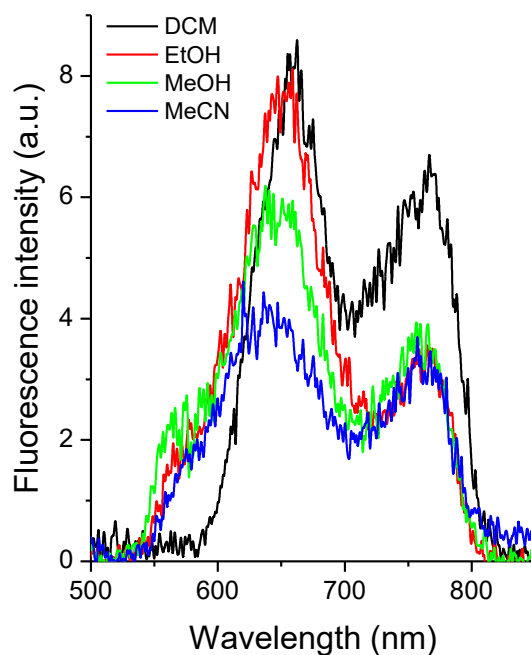

**Figure S33.** Steady-state fluorescence emission spectra of *meso*-substituted cyanine dye **8a** in solution of different organic solvents [ $\sim 10^{-6}$  M] at excitation wavelength between 559-602 nm (Table 2). (DCM=dichloromethane and MeCN=acetonitrile).

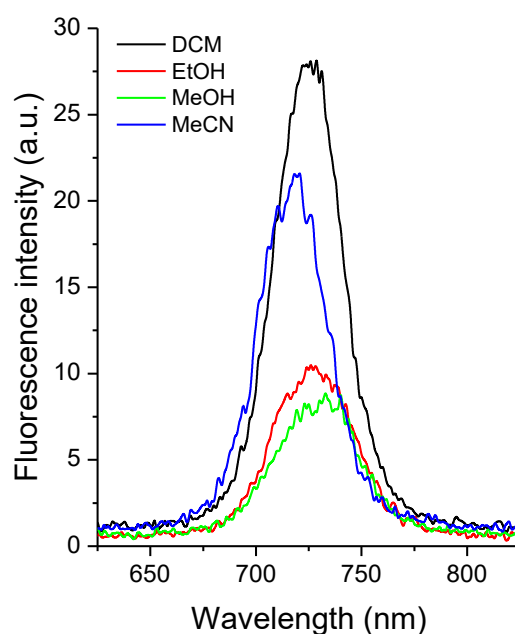

**Figure S34.** Steady-state fluorescence emission spectra of *meso*-substituted cyanine dye **8a** in solution of different organic solvents [ $\sim 10^{-6}$  M] at excitation wavelength between 703-712 nm (Table S2). (DCM=dichloromethane and MeCN=acetonitrile).

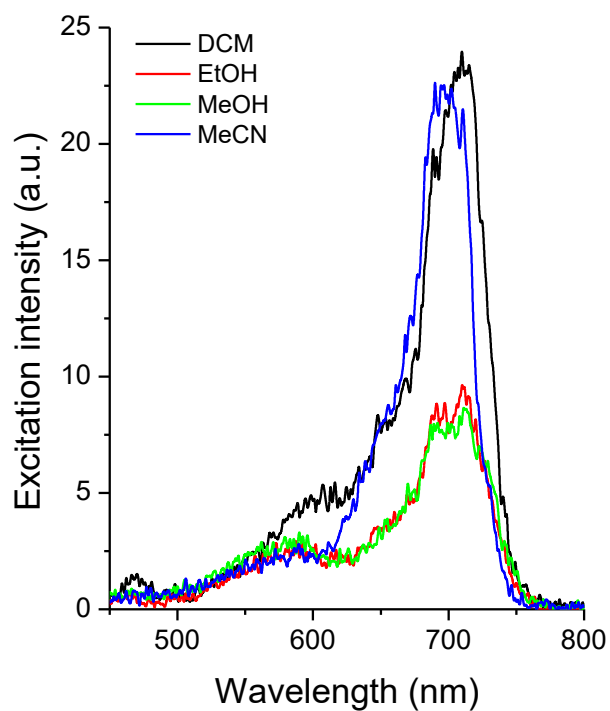

**Figure S35.** Excitation spectra of the *meso*-substituted cyanine dye **8a** in different organic solvents under the observation wavelength around 700 nm.

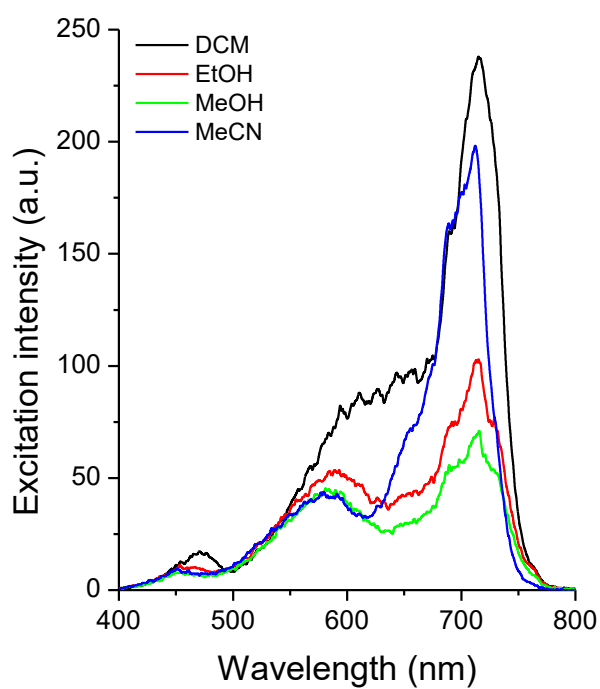

**Figure S36.** Excitation spectra of the *meso*-substituted cyanine dye **8b** in different organic solvents under the observation wavelength around 700 nm.

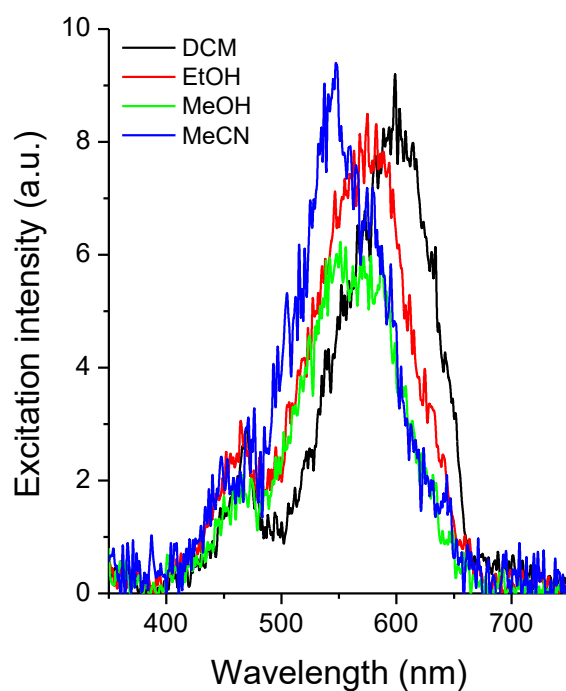

**Figure S37.** Excitation spectra of the *meso*-substituted cyanine dye **8a** in different organic solvents under the observation wavelength around 650 nm.

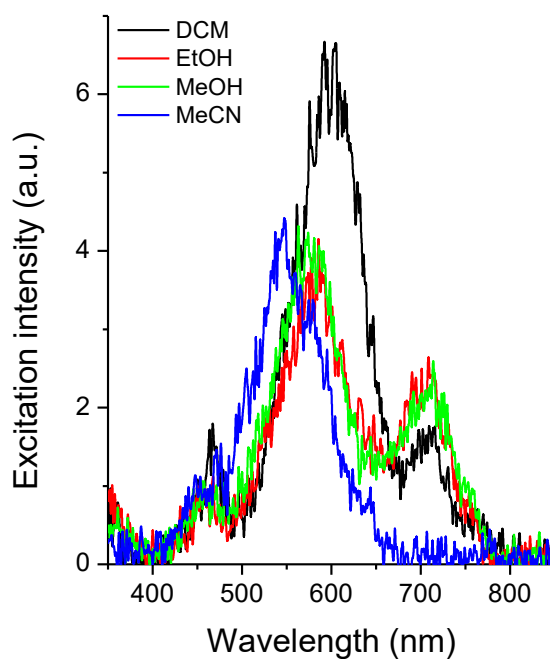

**Figure S38.** Excitation spectra of the *meso*-substituted cyanine dye **8a** in different organic solvents under the observation wavelength around 750 nm.

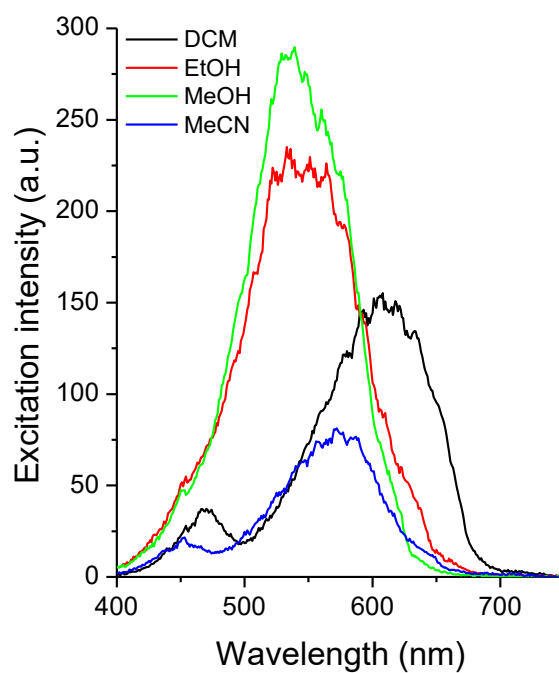

**Figure S39.** Excitation spectra of the *meso*-substituted cyanine dye **8b** in different organic solvents under the observation wavelength around 650 nm.

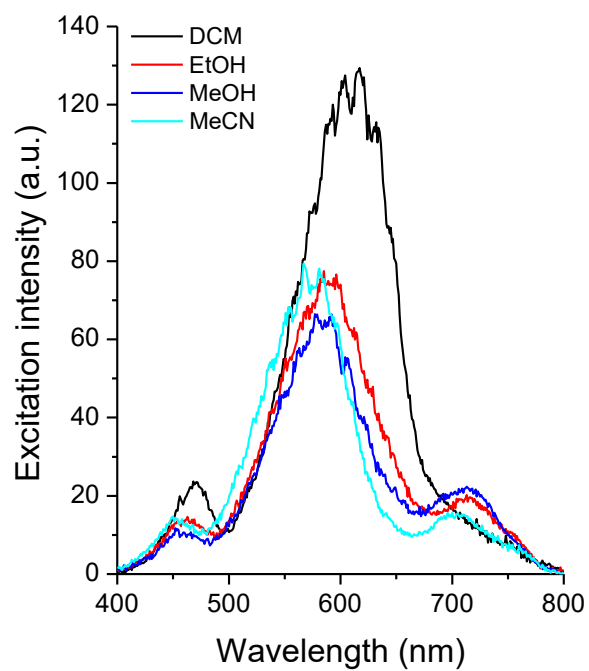

**Figure S40.** Excitation spectra of the *meso*-substituted cyanine dye **8b** in different organic solvents under the observation wavelength around 750 nm.

**Table S1** Lippert-Mataga data of the meso-substituted cyanine dye **8b** in 1,4-dioxane/acetonitrile mixtures, where  $\Delta f$  is the solvent polarity function,  $\lambda_{\text{abs}}$  and  $\lambda_{\text{em}}$  (in  $\text{cm}^{-1}$ ) are the absorption and emission maxima and  $\Delta\lambda_{\text{ST}}$  is the Stokes shift (in  $\text{cm}^{-1}$ ).

| Mixture | Solvent volume (mL) |             | $\Delta f$ | $\lambda_{\text{abs}}$ | $\lambda_{\text{em}}^{\text{a)}$ | $\lambda_{\text{em}}^{\text{b)}$ | Stokes shift                           |                                        |
|---------|---------------------|-------------|------------|------------------------|----------------------------------|----------------------------------|----------------------------------------|----------------------------------------|
|         | Acetonitrile        | 1,4-Dioxane |            |                        |                                  |                                  | $\Delta\lambda_{\text{ST}}^{\text{a)}$ | $\Delta\lambda_{\text{ST}}^{\text{b)}$ |
| 1       | 1.0                 | 0.5         | 0.298      | 17422                  | 15267                            | 13038                            | 2155                                   | 4384                                   |
| 2       | 1.0                 | 1.0         | 0.274      | 17331                  | 15198                            | 13038                            | 2133                                   | 4293                                   |
| 3       | 1.0                 | 1.5         | 0.254      | 17271                  | 15221                            | 13004                            | 2050                                   | 4267                                   |
| 4       | 1.0                 | 2.0         | 0.226      | 17182                  | 15198                            | 12970                            | 1984                                   | 4212                                   |
| 5       | 1.0                 | 2.5         | 0.205      | 17153                  | 15198                            | 12987                            | 1955                                   | 4166                                   |

<sup>a)</sup> emission at shorter wavelength

<sup>b)</sup> emission at longer wavelength



## Theoretical calculations

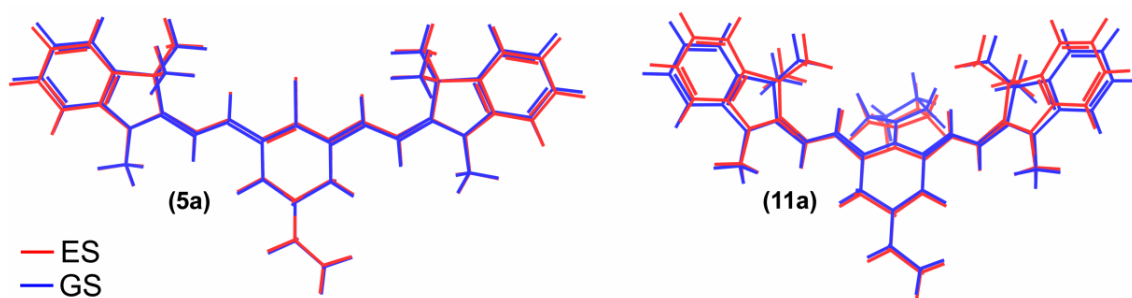

**Figure S41.** Optimized geometries for cyanines **8a** and **6a** to the ground (GS blue) and excited (ES red) states.

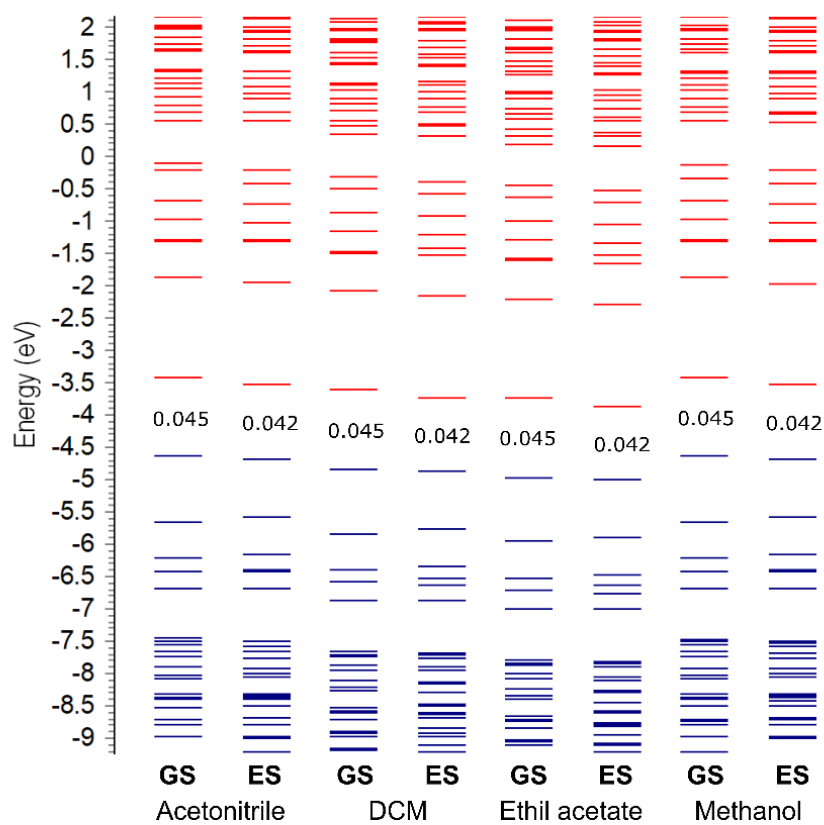

**Figure S42.** HOMO-LUMO gap in Hartree for cyanines **8a** in the ground (GS) and excited (ES) states under different solvation conditions using the B97-3c scheme.

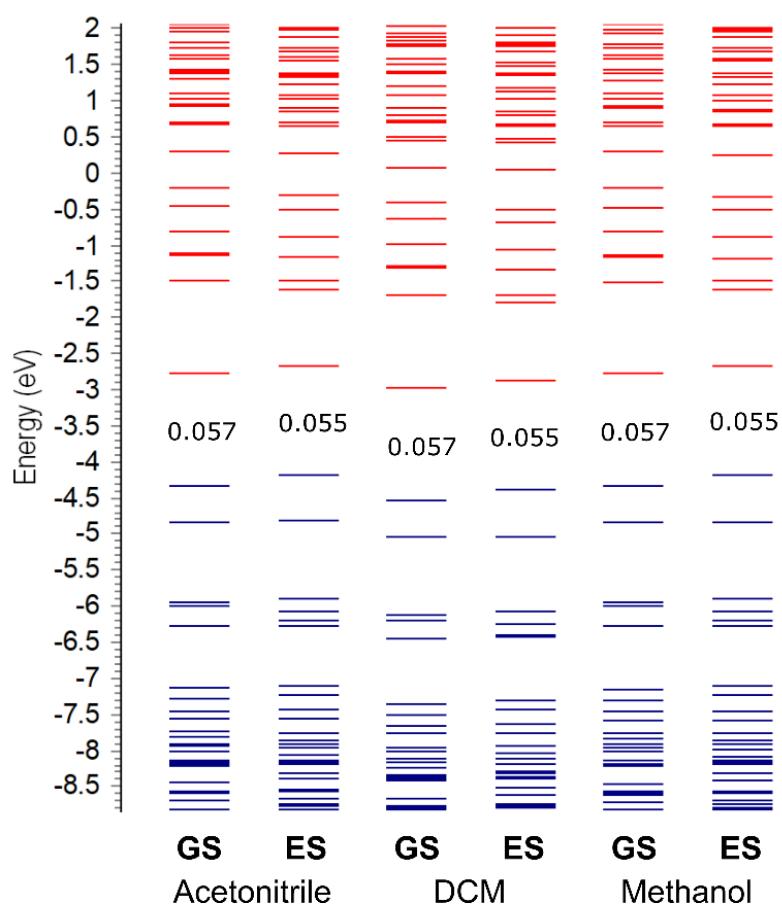

**Figure S43.** HOMO-LUMO gap in Hartree for cyanines **6a** in the ground (GS) and excited (ES) states under different solvation conditions using the B97-3c scheme.

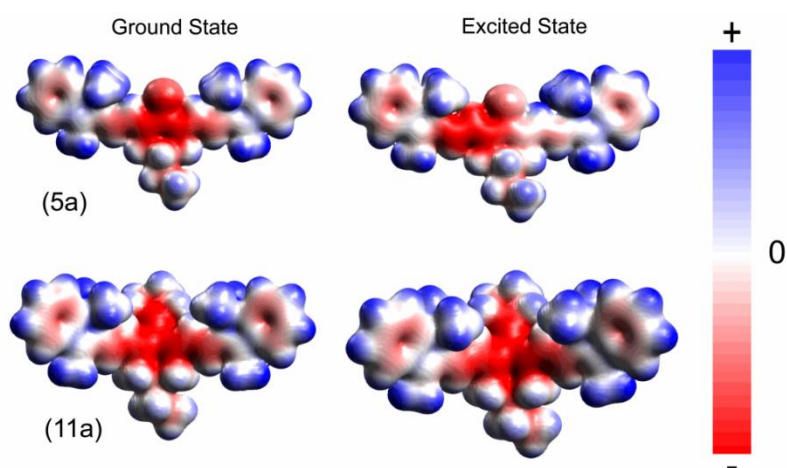

**Figure S44.** Molecular Electrostatic Potential Surfaces for cyanines **8a** and **6a**, where the red color indicates increased negative charge, blue positive charge and white a neutral environment.

**Table S2** Atomic charge distribution of the *meso*-substituted cyanine dye **8a** using CHELPG.

| GS   | Acetonitrile | DCM     | Ethyl acetate | MeOH    |
|------|--------------|---------|---------------|---------|
| 0 C  | -0.2922      | -0.2871 | -0.2912       | -0.2860 |
| 1 C  | 0.4660       | 0.4575  | 0.4595        | 0.4565  |
| 2 C  | -0.4143      | -0.4148 | -0.4094       | -0.4197 |
| 3 C  | -0.1158      | -0.1191 | -0.1215       | -0.1165 |
| 4 C  | -0.0906      | -0.0821 | -0.0801       | -0.0843 |
| 5 N  | 0.1243       | 0.1163  | 0.1165        | 0.1134  |
| 6 C  | 0.1228       | 0.1193  | 0.1173        | 0.1258  |
| 7 C  | -0.0791      | -0.0766 | -0.0757       | -0.0828 |
| 8 C  | -0.2087      | -0.2125 | -0.2102       | -0.2134 |
| 9 C  | -0.1600      | -0.1575 | -0.1554       | -0.1604 |
| 10 C | -0.1465      | -0.1456 | -0.1433       | -0.1485 |
| 11 C | -0.2569      | -0.2521 | -0.2508       | -0.2565 |
| 12 H | 0.1931       | 0.1899  | 0.1884        | 0.1928  |
| 13 H | 0.1614       | 0.1603  | 0.1599        | 0.1609  |
| 14 H | 0.1567       | 0.1571  | 0.1568        | 0.1572  |
| 15 H | 0.1747       | 0.1760  | 0.1745        | 0.1773  |
| 16 C | 0.6308       | 0.6343  | 0.6288        | 0.6465  |
| 17 C | -0.5557      | -0.5550 | -0.5526       | -0.5612 |
| 18 H | 0.1465       | 0.1465  | 0.1461        | 0.1477  |
| 19 H | 0.1339       | 0.1338  | 0.1339        | 0.1345  |
| 20 H | 0.1532       | 0.1496  | 0.1489        | 0.1509  |
| 21 C | -0.5636      | -0.5525 | -0.5508       | -0.5579 |
| 22 H | 0.1513       | 0.1476  | 0.1473        | 0.1487  |
| 23 H | 0.1475       | 0.1425  | 0.1425        | 0.1433  |
| 24 H | 0.1365       | 0.1340  | 0.1342        | 0.1344  |
| 25 C | -0.4139      | -0.4081 | -0.4066       | -0.4065 |
| 26 H | 0.1787       | 0.1796  | 0.1789        | 0.1796  |
| 27 H | 0.1684       | 0.1654  | 0.1641        | 0.1663  |
| 28 H | 0.1706       | 0.1680  | 0.1668        | 0.1688  |
| 29 H | 0.1707       | 0.1727  | 0.1711        | 0.1752  |
| 30 H | 0.2129       | 0.2135  | 0.2100        | 0.2157  |
| 31 C | -0.6094      | -0.5955 | -0.5970       | -0.5964 |
| 32 H | 0.1561       | 0.1505  | 0.1503        | 0.1514  |
| 33 H | 0.1601       | 0.1559  | 0.1557        | 0.1568  |
| 34 C | 0.3639       | 0.3709  | 0.3679        | 0.3748  |
| 35 H | -0.0205      | -0.0216 | -0.0209       | -0.0231 |
| 36 C | 0.0879       | 0.0717  | 0.0724        | 0.0733  |
| 37 H | 0.0052       | 0.0067  | 0.0070        | 0.0067  |
| 38 H | -0.0041      | -0.0013 | -0.0009       | -0.0019 |
| 39 C | -0.3703      | -0.3571 | -0.3623       | -0.3598 |
| 40 H | 0.0817       | 0.0786  | 0.0805        | 0.0787  |
| 41 H | 0.0861       | 0.0810  | 0.0818        | 0.0825  |
| 42 H | 0.0963       | 0.0958  | 0.0982        | 0.0945  |
| 43 C | -0.3301      | -0.3101 | -0.3046       | -0.3137 |
| 44 C | 0.2512       | 0.2395  | 0.2422        | 0.2383  |

|              |           |               |               |               |               |
|--------------|-----------|---------------|---------------|---------------|---------------|
| <b>45</b>    | <b>C</b>  | -0.2847       | -0.2753       | -0.2736       | -0.2789       |
| <b>46</b>    | <b>C</b>  | -0.2208       | -0.2332       | -0.2304       | -0.2325       |
| <b>47</b>    | <b>C</b>  | -0.0136       | -0.0094       | -0.0132       | -0.0087       |
| <b>48</b>    | <b>N</b>  | 0.1086        | 0.1049        | 0.1076        | 0.1032        |
| <b>49</b>    | <b>C</b>  | 0.1004        | 0.1074        | 0.1042        | 0.1115        |
| <b>50</b>    | <b>C</b>  | -0.0468       | -0.0592       | -0.0572       | -0.0611       |
| <b>51</b>    | <b>C</b>  | -0.2212       | -0.2202       | -0.2189       | -0.2215       |
| <b>52</b>    | <b>C</b>  | -0.1576       | -0.1496       | -0.1476       | -0.1548       |
| <b>53</b>    | <b>C</b>  | -0.1478       | -0.1533       | -0.1503       | -0.1544       |
| <b>54</b>    | <b>C</b>  | -0.2444       | -0.2448       | -0.2435       | -0.2487       |
| <b>55</b>    | <b>H</b>  | 0.1903        | 0.1896        | 0.1881        | 0.1923        |
| <b>56</b>    | <b>H</b>  | 0.1602        | 0.1620        | 0.1613        | 0.1621        |
| <b>57</b>    | <b>H</b>  | 0.1565        | 0.1555        | 0.1553        | 0.1565        |
| <b>58</b>    | <b>H</b>  | 0.1782        | 0.1773        | 0.1761        | 0.1787        |
| <b>59</b>    | <b>C</b>  | 0.5693        | 0.5830        | 0.5795        | 0.5901        |
| <b>60</b>    | <b>C</b>  | -0.5441       | -0.5292       | -0.5288       | -0.5354       |
| <b>61</b>    | <b>H</b>  | 0.1319        | 0.1277        | 0.1283        | 0.1283        |
| <b>62</b>    | <b>H</b>  | 0.1418        | 0.1340        | 0.1344        | 0.1356        |
| <b>63</b>    | <b>H</b>  | 0.1498        | 0.1469        | 0.1466        | 0.1482        |
| <b>64</b>    | <b>C</b>  | -0.5378       | -0.5482       | -0.5452       | -0.5514       |
| <b>65</b>    | <b>H</b>  | 0.1463        | 0.1443        | 0.1436        | 0.1456        |
| <b>66</b>    | <b>H</b>  | 0.1461        | 0.1489        | 0.1481        | 0.1495        |
| <b>67</b>    | <b>H</b>  | 0.1299        | 0.1339        | 0.1339        | 0.1337        |
| <b>68</b>    | <b>C</b>  | -0.3919       | -0.3982       | -0.3971       | -0.3993       |
| <b>69</b>    | <b>H</b>  | 0.1732        | 0.1761        | 0.1754        | 0.1770        |
| <b>70</b>    | <b>H</b>  | 0.1679        | 0.1689        | 0.1678        | 0.1703        |
| <b>71</b>    | <b>H</b>  | 0.1639        | 0.1645        | 0.1634        | 0.1660        |
| <b>72</b>    | <b>H</b>  | 0.1805        | 0.1848        | 0.1821        | 0.1874        |
| <b>73</b>    | <b>H</b>  | 0.2084        | 0.2086        | 0.2058        | 0.2102        |
| <b>74</b>    | <b>H</b>  | 0.1230        | 0.1169        | 0.1144        | 0.1190        |
| <b>75</b>    | <b>H</b>  | 0.1129        | 0.1073        | 0.1051        | 0.1095        |
| <b>76</b>    | <b>Cl</b> | -0.0853       | -0.0880       | -0.0834       | -0.0919       |
| <b>Total</b> |           | <b>1.0000</b> | <b>1.0000</b> | <b>1.0000</b> | <b>1.0000</b> |

**Table S3.** Atomic charge distribution of cyanine dye **6a** using CHELPG.

| <b>GS</b> | <b>Acetonitrile</b> | <b>DCM</b> | <b>MeOH</b> |
|-----------|---------------------|------------|-------------|
|-----------|---------------------|------------|-------------|

|    |   |         |         |         |
|----|---|---------|---------|---------|
| 0  | N | 0.0462  | 0.0422  | 0.0461  |
| 1  | N | 0.1017  | 0.1048  | 0.1002  |
| 2  | N | 0.1091  | 0.1058  | 0.1091  |
| 3  | C | -0.0010 | -0.0002 | -0.0018 |
| 4  | C | -0.1319 | -0.1301 | -0.1305 |
| 5  | C | -0.1173 | -0.1151 | -0.1184 |
| 6  | C | 0.0129  | 0.0111  | 0.0140  |
| 7  | C | -0.3699 | -0.3690 | -0.3697 |
| 8  | C | 0.0448  | 0.0457  | 0.0448  |
| 9  | C | -0.4007 | -0.3996 | -0.4002 |
| 10 | C | -0.6069 | -0.6032 | -0.6083 |
| 11 | C | -0.5915 | -0.5851 | -0.5901 |
| 12 | C | 0.7250  | 0.6977  | 0.7195  |
| 13 | C | -0.2671 | -0.2661 | -0.2693 |
| 14 | C | -0.1567 | -0.1518 | -0.1554 |
| 15 | C | -0.1841 | -0.1803 | -0.1847 |
| 16 | C | -0.2085 | -0.2092 | -0.2082 |
| 17 | C | -0.1020 | -0.0876 | -0.1009 |
| 18 | C | 0.1254  | 0.1192  | 0.1274  |
| 19 | C | -0.1480 | -0.1360 | -0.1447 |
| 20 | C | -0.1694 | -0.1756 | -0.1703 |
| 21 | C | -0.3780 | -0.3692 | -0.3779 |
| 22 | C | 0.3798  | 0.3796  | 0.3801  |
| 23 | C | -0.5346 | -0.5342 | -0.5347 |
| 24 | C | 0.2711  | 0.2677  | 0.2709  |
| 25 | C | -0.1628 | -0.1636 | -0.1627 |
| 26 | C | -0.3930 | -0.3896 | -0.3936 |
| 27 | C | -0.5631 | -0.5557 | -0.5593 |
| 28 | C | -0.5874 | -0.5841 | -0.5856 |
| 29 | C | 0.7055  | 0.6997  | 0.7065  |
| 30 | C | -0.2783 | -0.2788 | -0.2797 |
| 31 | C | -0.1464 | -0.1387 | -0.1454 |
| 32 | C | -0.1860 | -0.1837 | -0.1860 |
| 33 | C | -0.2114 | -0.2069 | -0.2106 |
| 34 | C | -0.0903 | -0.0927 | -0.0926 |
| 35 | C | 0.1224  | 0.1261  | 0.1241  |
| 36 | C | -0.1625 | -0.1593 | -0.1635 |
| 37 | C | -0.1530 | -0.1515 | -0.1526 |
| 38 | C | -0.3489 | -0.3478 | -0.3493 |
| 39 | C | 0.0560  | 0.0579  | 0.0560  |
| 40 | C | -0.1633 | -0.1639 | -0.1633 |
| 41 | H | 0.0651  | 0.0640  | 0.0651  |
| 42 | H | 0.0932  | 0.0903  | 0.0931  |
| 43 | H | 0.0779  | 0.0775  | 0.0775  |
| 44 | H | 0.0723  | 0.0720  | 0.0721  |
| 45 | H | 0.0684  | 0.0684  | 0.0686  |

|              |          |               |               |               |
|--------------|----------|---------------|---------------|---------------|
| <b>46</b>    | <b>H</b> | 0.0707        | 0.0698        | 0.0708        |
| <b>47</b>    | <b>H</b> | 0.0954        | 0.0951        | 0.0952        |
| <b>48</b>    | <b>H</b> | 0.0553        | 0.0527        | 0.0549        |
| <b>49</b>    | <b>H</b> | 0.0796        | 0.0800        | 0.0795        |
| <b>50</b>    | <b>H</b> | 0.0835        | 0.0831        | 0.0834        |
| <b>51</b>    | <b>H</b> | 0.1014        | 0.1027        | 0.1014        |
| <b>52</b>    | <b>H</b> | 0.0183        | 0.0189        | 0.0184        |
| <b>53</b>    | <b>H</b> | 0.0103        | 0.0100        | 0.0104        |
| <b>54</b>    | <b>H</b> | 0.1394        | 0.1384        | 0.1394        |
| <b>55</b>    | <b>H</b> | 0.1304        | 0.1304        | 0.1305        |
| <b>56</b>    | <b>H</b> | 0.1601        | 0.1545        | 0.1602        |
| <b>57</b>    | <b>H</b> | 0.1778        | 0.1765        | 0.1778        |
| <b>58</b>    | <b>H</b> | 0.1754        | 0.1744        | 0.1752        |
| <b>59</b>    | <b>H</b> | 0.1550        | 0.1540        | 0.1549        |
| <b>60</b>    | <b>H</b> | 0.1546        | 0.1536        | 0.1545        |
| <b>61</b>    | <b>H</b> | 0.1484        | 0.1487        | 0.1491        |
| <b>62</b>    | <b>H</b> | 0.1624        | 0.1620        | 0.1631        |
| <b>63</b>    | <b>H</b> | 0.1387        | 0.1400        | 0.1395        |
| <b>64</b>    | <b>H</b> | 0.1459        | 0.1455        | 0.1457        |
| <b>65</b>    | <b>H</b> | 0.1330        | 0.1335        | 0.1329        |
| <b>66</b>    | <b>H</b> | 0.1556        | 0.1537        | 0.1557        |
| <b>67</b>    | <b>H</b> | 0.1701        | 0.1696        | 0.1702        |
| <b>68</b>    | <b>H</b> | 0.1555        | 0.1555        | 0.1556        |
| <b>69</b>    | <b>H</b> | 0.1607        | 0.1601        | 0.1604        |
| <b>70</b>    | <b>H</b> | 0.1857        | 0.1850        | 0.1864        |
| <b>71</b>    | <b>H</b> | 0.0139        | 0.0135        | 0.0140        |
| <b>72</b>    | <b>H</b> | 0.0883        | 0.0886        | 0.0883        |
| <b>73</b>    | <b>H</b> | 0.0890        | 0.0883        | 0.0889        |
| <b>74</b>    | <b>H</b> | 0.2355        | 0.2340        | 0.2355        |
| <b>75</b>    | <b>H</b> | 0.1569        | 0.1541        | 0.1568        |
| <b>76</b>    | <b>H</b> | 0.1688        | 0.1675        | 0.1689        |
| <b>77</b>    | <b>H</b> | 0.1595        | 0.1580        | 0.1596        |
| <b>78</b>    | <b>H</b> | 0.1540        | 0.1529        | 0.1542        |
| <b>79</b>    | <b>H</b> | 0.1389        | 0.1371        | 0.1378        |
| <b>80</b>    | <b>H</b> | 0.1261        | 0.1260        | 0.1250        |
| <b>81</b>    | <b>H</b> | 0.1474        | 0.1435        | 0.1462        |
| <b>82</b>    | <b>H</b> | 0.1403        | 0.1374        | 0.1395        |
| <b>83</b>    | <b>H</b> | 0.1468        | 0.1461        | 0.1462        |
| <b>84</b>    | <b>H</b> | 0.1339        | 0.1347        | 0.1335        |
| <b>85</b>    | <b>H</b> | 0.1699        | 0.1680        | 0.1697        |
| <b>86</b>    | <b>H</b> | 0.1562        | 0.1561        | 0.1561        |
| <b>87</b>    | <b>H</b> | 0.1568        | 0.1550        | 0.1566        |
| <b>88</b>    | <b>H</b> | 0.1915        | 0.1905        | 0.1919        |
| <b>Total</b> |          | <b>1.0000</b> | <b>1.0000</b> | <b>1.0000</b> |
